# Supplementary material
Source: ML conference proceedings conference paper supplement (https://openreview.net/forum?id=63iVrXc8cC)
Supplement: supplementary_material [file supplementary.pdf › supplementary (SWE-smith)/supplementary.pdf]

## 878 Appendix

879 The appendix is generally structured as follows. In Sections [A](#) to [D](#), we review details about  
 880 SWE-smith’s infrastructure and collection strategies for curating the SWE-smith task instances  
 881 and execution environments, providing comparisons to existing datasets such as SWE-bench and  
 882 SWE-gym along the way. In Sections [E](#) and onward, we discuss more about how we created the  
 883 trajectories dataset, then provide additional ablations and results showcasing the effectiveness of  
 884 SWE-smith as a dataset.

### SWE-smith Overview

1. Given a GitHub repository, turn it into an execution environment

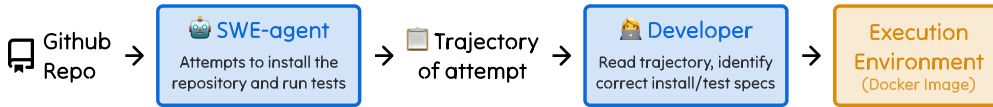

2. Given an execution environment, synthesize task instances

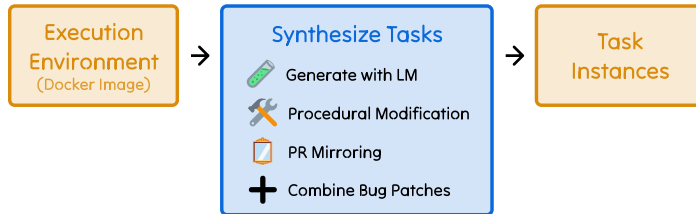

3. Given an execution environment + task instances, train SWE-agents!

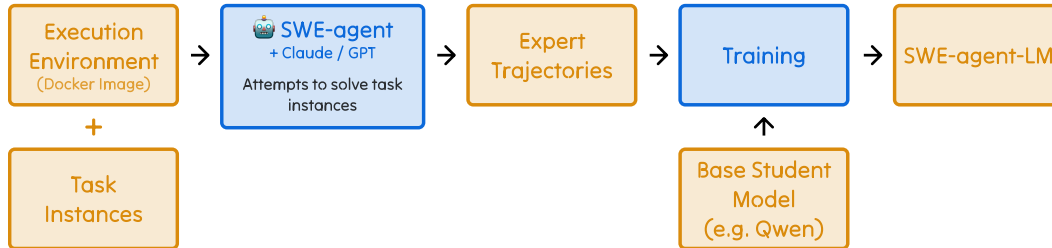

Figure 9: An overview of pipelines in SWE-smith. Scripts/functions and manual steps are highlighted in **blue**. Artifacts that are also the inputs and outputs of these scripts are in **orange**. SWE-smith fits in seamlessly with the SWE-bench and SWE-agent ecosystem. Use SWE-smith to construct execution environments and generate task instances. Use SWE-agent to generate expert trajectories on SWE-smith task instances and run inference with models trained on these trajectories. Use SWE-bench to evaluate your models on resolving GitHub issues and performing SWE tasks.

## 885 A Infrastructure

886 We cover additional details about how SWE-smith works, specifically

- 887 • The form factor of a SWE-smith task instance.
- 888 • How we identify repositories and the SWE-agent configuration we use to automatically  
889 install them.
- 890 • How the task validation and evaluation harnesses work.

## A.1 SWE-smith Task Instance

We briefly review the format of a SWE-smith task instance, highlight how it is different from a SWE-bench task instance, and discuss why SWE-smith’s relatively simple infrastructure compared to SWE-bench allows us scale task collection much more efficiently.

A SWE-smith task instance is very similar to the form factor of a SWE-bench task instance, with several minor differences. A SWE-smith task instance includes the following fields:

- `repo`: The repository the task instance is from.
- `instance_id`: A unique identifier (usually `(repo) . (bug_type) . (hash)`)
- `base_commit`: Hash of the GitHub branch that points to the repository with the bug patch applied.
- `patch`: The diff that causes the bug. It is applied to the original codebase to create the bug. Reverting this patch is effectively the solution.
- `problem_statement`: The generated issue text that conveys the bug. It is provided to a model or system before it begins attempting a fix.
- `created_at`: A timestamp matching when the bug was successfully validated and pushed to the mirror repository as a branch.
- `FAIL_TO_PASS`: The unit tests that break when the test suite is run with the bug patch applied.
- `PASS_TO_PASS`: The unit tests that do not break. These correspond to the set of all tests minus the `FAIL_TO_PASS` tests.

We summarize the key distinctions between a SWE-smith and SWE-bench task instance:

- SWE-smith task instances do not include the `version` or `environment_setup_commit` fields, which SWE-bench requires as additional identifiers for specifying repository-specific installation instructions across time. In SWE-smith, unique installation instructions are specified for each (repository, commit).
- The `hints_text` field is not included. In SWE-bench, this refers to the issue and PR thread comments written after the first commit of the corresponding PR.
- The `created_at` field is assigned the timestamp reflecting when the bug was successfully validated. Originally, `created_at` refers to when a PR was created.
- There is no `test_patch` field, as the SWE-smith collection pipeline does not create or synthesize any hidden tests. All `FAIL_TO_PASS` bugs are visible and runnable in the repository at inference time.

## A.2 Repository Selection

In addition to the criteria discussed in Section 2.1, we also ensure that a repository has a license that allows non-proprietary use. The majority of software licenses are permissive (BSD, MIT, Apache), while the remainder are largely protective licenses (GPL) that still allow for non-commercial use. We inspected the repositories with custom licenses and confirmed they allowed for the use cases exercised in our work. The licenses for each repository are fully listed in Table 6.

We deliberately limit the search scope for repositories to those predominantly written in Python. Following precedents, focusing on Python repositories allowed us to form assumptions about installation and testing procedures (e.g. repository is organized as a PyPI package, `pytest` is the testing framework) that made scaling up automatic repository setup with SWE-agent more tractable. A worthwhile direction to consider for future work is expanding the coverage of repositories to be more comprehensive of codebases written in different programming languages, as Yang et al. [50] does, extending SWE-bench style evaluation to JavaScript repositories with multimodal inputs.

**Automated repository installation.** The goal of this step is to first, get the installation and testing instructions for a repository, and second, create a Docker image containing the repository with the development environment set up.

Table 6: License associated with each repository as of April 8, 2025. All licenses are permissive and allow for public, nonprofit use.

|                                         |                                                                                                                                                                                                                                                                                                                                                                                                                                                                                                                                                                                                                                                                                                                                                                                                                                                                                                                                                                                                                                                                                                                                                                                     |
|-----------------------------------------|-------------------------------------------------------------------------------------------------------------------------------------------------------------------------------------------------------------------------------------------------------------------------------------------------------------------------------------------------------------------------------------------------------------------------------------------------------------------------------------------------------------------------------------------------------------------------------------------------------------------------------------------------------------------------------------------------------------------------------------------------------------------------------------------------------------------------------------------------------------------------------------------------------------------------------------------------------------------------------------------------------------------------------------------------------------------------------------------------------------------------------------------------------------------------------------|
| Apache License 2.0                      | Project-MONAI/MONAI; alanjds/drf-nested-routers; arrow-py/arrow; buriy/python-readability; facebookresearch/fvcore; getmoto/moto; google/textfsm; iterative/dvc; jax-ml/jax; jd/tenacity; kayak/pypika; modin-project/modin; pyca/pyopenssl; spulec/freezegun; tkrajina/gpxpy; tornadoweb/tornado; weaveworks/grafanalib                                                                                                                                                                                                                                                                                                                                                                                                                                                                                                                                                                                                                                                                                                                                                                                                                                                            |
| BSD 2-Clause "Simplified" License       | madzak/python-json-logger; pyasn1/pyasn1; pygments/pygments; sunpy/sunpy                                                                                                                                                                                                                                                                                                                                                                                                                                                                                                                                                                                                                                                                                                                                                                                                                                                                                                                                                                                                                                                                                                            |
| BSD 3-Clause "New" or "Revised" License | Suor/funcy; alecthomas/voluptuous; andialbrecht/sqlparse; cookiecutter/cookiecutter; dask/dask; django/channels; django/daphne; encode/starlette; gawel/pyquery; gweis/isodate; john-kurkowski/tldextract; lepture/mistune; oauthlib/oauthlib; pallets/click; pallets/flask; pallets/jinja; pallets/markupsafe; pandas-dev/pandas; scrapy/scrapy; theskumar/python-dotenv                                                                                                                                                                                                                                                                                                                                                                                                                                                                                                                                                                                                                                                                                                                                                                                                           |
| GNU General Public License v3.0         | Cog-Creators/Red-DiscordBot; adrienverge/yamllint                                                                                                                                                                                                                                                                                                                                                                                                                                                                                                                                                                                                                                                                                                                                                                                                                                                                                                                                                                                                                                                                                                                                   |
| GNU Lesser General Public License v2.1  | chardet/chardet; paramiko/paramiko; pylint-dev/astroid                                                                                                                                                                                                                                                                                                                                                                                                                                                                                                                                                                                                                                                                                                                                                                                                                                                                                                                                                                                                                                                                                                                              |
| GNU Lesser General Public License v3.0  | Knio/dominate                                                                                                                                                                                                                                                                                                                                                                                                                                                                                                                                                                                                                                                                                                                                                                                                                                                                                                                                                                                                                                                                                                                                                                       |
| ISC License                             | kennethreitz/records                                                                                                                                                                                                                                                                                                                                                                                                                                                                                                                                                                                                                                                                                                                                                                                                                                                                                                                                                                                                                                                                                                                                                                |
| MIT License                             | amueller/word_cloud; borntyping/python-colorlog; bottlepy/bottle; cantools/cantools; cdgriffith/Box; cknd/stackprinter; conan-io/conan; cool-RR/PySnooper; datamade/usaddress; dbader/schedule; erikrose/parsimonious; facebookresearch/hydra; facelessuser/soupsieve; getnikola/nikola; graphql-python/graphene; hukkin/tomli; jaraco/inflect; jawah/charset_normalizer; joke2k/faker; keleshev/schema; life4/textdistance; luozhouyang/python-string-similarity; marshmallow-code/apispec; marshmallow-code/marshmallow; marshmallow-code/webargs; martinblech/xmltodict; matthewwithanm/python-markdownify; mewwts/addict; mido/mido; mozillaz/python-pinyin; msiemens/tinydb; pdfminer/pdfminer; pndurette/gTTS; pudo/dataset; pydantic/pydantic; pyparsing/pyparsing; pytest-dev/iniconfig; python-hyper/h11; python-jsonschema/jsonschema; python-xmlschema/python-docx; pyupio/safety; pyvista/pyvista; richardj0n3s/parse; rsalmei/alive-progress; rubik/radon; rustedpy/result; scanny/python-pptx; seatgeek/thefuzz; sloria/environs; sqlfluff/sqlfluff; termcolor/termcolor; tobymao/sqlglot; tox-dev/pipdeptree; tweepy/tweepy; un33k/python-slugify; vi3k6i5/flashtext |
| Other                                   | Mimino666/langdetect; PyCQA/flake8; agronholm/exceptiongroup; agronholm/typeguard; aio-lib/asyn-timeout; benoitc/gunicorn; cloudpipe/cloudpickle; davidhalter/parso; django-money/django-money; gruns/furl; kurtmckee/feedparser; lincolnloop/python-qrcode; mahmoud/boltons; mahmoud/glom; mozilla/bleach; pexpect/ptyprocess; prettytable/prettytable; pwaller/pyfiglet; pydata/patsy; pydicom/pydicom; python-trio/trio; python/mypy; pyutils/line_profiler; seperman/deepdiff                                                                                                                                                                                                                                                                                                                                                                                                                                                                                                                                                                                                                                                                                                   |

939 We provide the system prompt given to SWE-agent that asks it to install a repository in Figure [A.2](#)  
940 Each repository installation task is initialized with a clone of the original repository. No additional  
941 steps (e.g. pypi package downloads, conda environment setup) are performed.

942 We run SWE-agent with claude-3-5-sonnet-20241022 with a maximum cost limit of \$2 and a  
943 maximum call limit of 150. The installation run terminates whenever one of these conditions is met.

944 For every run, we record the interactions. We then manually review the trajectory, identifying the  
945 appropriate installation and testing specifications.

946 Each run incurs an average cost of \$0.72 and an average of 17 steps before SWE-agent issues the  
947 `submit` command. The runs typically finish within two minutes. The majority of Python repositories  
948 require fewer steps — typically, SWE-agent will view the `CONTRIBUTING.md`, run the installation  
949 command provided verbatim in the text, and then runs `pytest`, showing all tests passing. A minority  
950 of repositories will require several steps because additional dependencies must be installed with  
951 `apt-get`. The manual review process following this requires 3 to 20 minutes. One author carried out  
952 this effort for 128 repositories, taking an estimated 18 human hours to accomplish. In the process of  
953 reaching 128 repositories, the author gave up on 17 repositories at the manual review stage.

#### System prompt for generating bugs with an LM

```
<uploaded_files>
{{working_dir}}
</uploaded_files>
```

I've uploaded a python code repository in the directory `{{working_dir}}`.

Can you please install this repository? Your goal should be to configure the repository's development environment such that existing tests pass. You are currently in the root directory of the repository, and nothing has been installed yet. You in an Ubuntu 22.04 environment.

The repository is predominantly written in Python. Here are several tips for installing it:

1. A good place to start is to look for a `CONTRIBUTING.md` file, which will often contain instructions on how to install the repository and any dependencies it may have. Occasionally, the `README.md` file may also contain installation instructions.
2. Usually, a repository may have `setup.py` or `pyproject.toml` files which can be used to install the package. `pip install -e .` is commonly used, although many packages will also require an additional specifier that installs development packages as well (e.g. `pip install -e .[dev]`).
3. To check whether the repository was installed successfully, run tests and see if they pass. You can usually find tests in a `tests/` or `test/` directory. You can run tests using `pytest` or `unittest`, depending on the framework used by the repository.
4. Sometimes, you will need to install additional packages, often listed in a `requirements.txt` or `environment.yml` file. Also, be mindful of Ubuntu system dependencies that may need to be installed via `apt-get` (e.g. `sudo apt-get install <package>`).

Once you are finished with installing the repository, run the `submit` command to submit your changes for review.

954

### 955 A.3 Validation, Evaluation Harnesses

956 We adapt SWE-bench's validation script to convert each bug patch into a SWE-bench style task  
957 instance. This step ensures SWE-smith can be run by existing SWE-bench solutions. The conversion  
958 involves two steps. First, the bug patch is applied and pushed as a branch to a mirror clone of the  
959 repository. Second, we create a SWE-bench style task instance from the bug patch, populating  
960 important fields such as Fail-to-Pass and Pass-to-Pass tests with information from the validation logs.

## B Bug Generation Strategies

In this section, we review each of the bug generation strategies we employ in depth. While we experimented with several bug generation strategies, the ones we elect to include are those we found to satisfy several desirable properties.

1. The approach works in a codebase-agnostic manner.
2. The approach reliably yields usable task instances (meaning 1+ passing tests break).
3. The approach is controllable; via each strategy's parameters, we can affect the quantity and quality of the generated bugs.

### System prompt for generating bugs with an LM

You are a software developer doing chaos monkey testing. Your job is to rewrite a function such that it introduces a logical bug that will break existing unit test(s) in a codebase. To this end, some kinds of bugs you might introduce include:

(Per inference call, only 3 of the following tips are randomly selected and shown)

- Alter calculation order for incorrect results: Rearrange the sequence of operations in a calculation to subtly change the output (e.g., change  $(a + b) * c$  to  $a + (b * c)$ ).
- Introduce subtle data transformation errors: Modify data processing logic, such as flipping a sign, truncating a value, or applying the wrong transformation function.
- Change variable assignments to alter computation state: Assign a wrong or outdated value to a variable that affects subsequent logic.
- Mishandle edge cases for specific inputs: Change handling logic to ignore or improperly handle boundary cases, like an empty array or a null input.
- Modify logic in conditionals or loops: Adjust conditions or loop boundaries (e.g., replace  $\leq$  with  $<$ ) to change the control flow.
- Introduce off-by-one errors in indices or loop boundaries: Shift an index or iteration boundary by one, such as starting a loop at 1 instead of 0.
- Adjust default values or constants to affect behavior: Change a hardcoded value or default parameter that alters how the function behaves under normal use.
- Reorder operations while maintaining syntax: Rearrange steps in a process so the function produces incorrect intermediate results without breaking the code.
- Swallow exceptions or return defaults silently: Introduce logic that catches an error but doesn't log or handle it properly, leading to silent failures.

Tips about the bug-introducing task:

(At inference time, tips are randomly shuffled)

- It should not cause compilation errors.
- It should not be a syntax error.
- It should be subtle and challenging to detect.
- It should not modify the function signature.
- It should not modify the documentation significantly.
- For longer functions, if there is an opportunity to introduce multiple bugs, please do!" - Please DO NOT INCLUDE COMMENTS IN THE CODE indicating the bug location or the bug itself.

Your answer should be formatted as follows:

Explanation: <explanation>

Bugged Code:

```
““
<bugged_code>
““
```

### B.1 Generating with an LM

We describe our workflows for generating bugs with an LM. For each function or class in a codebase, we prompt an LM to generate either a rewrite that introduces bugs or a complete re-implementation from scratch. This strategy is illustrated in Figure 10.

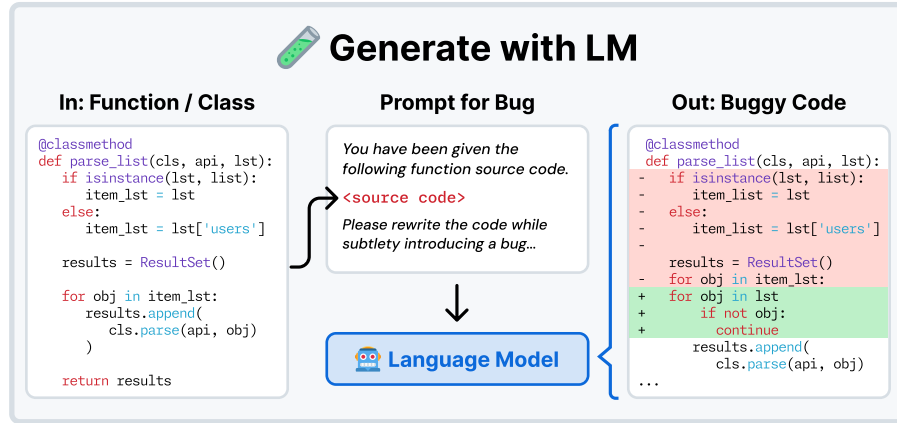

Figure 10: Workflow to generate bugs for a function or class with an LM. We first extract all functions or classes from a codebase, then enumerate across all candidates and prompt the LM to generate either a bug-laced rewrite or a re-implementation.

974 **Modify existing functions.** Given a Python codebase, we use the ast library to identify all unique  
 975 functions, excluding any functions found under a testing related directory (e.g. tests, testing).  
 976 Next, given a function, the LM is asked to write a new version that introduces logical, runtime  
 977 bugs. Within the prompt, shown in Figure B, several suggestions of types of bugs along with a  
 978 demonstration of a rewrite are provided.

**Prompts for reimplementing bugs with an LM**

**System Prompt**  
 You are a software developer and you have been asked to implement a function.

You will be given the contents of an entire file, with one or more functions defined in it. Please implement the function(s) that are missing. Do NOT modify the function signature, including the function name, parameters, return types, or docstring if provided. Do NOT change any other code in the file. You should not use any external libraries.

**Task Instance Prompt**  
 Please implement the function func\_signature in the following code:

{file\_src\_code}

Remember, you should not modify the function signature, including the function name, parameters, return types, or docstring if provided. Do NOT change any other code in the file. Format your output as:

[explanation]

{func\_to\_write}

979

980 In our experiments, we use OpenAI’s o3 mini model [28] (o3-mini-2025-01-31) as the main base  
 981 model for bug generation. Based on our empirical observations of an LM’s tendencies, we include  
 982 several explicit guidelines in the prompt about what the rewrite should not do. Notably, it is important  
 983 to ask the LM to not generate any inline comments denoting the location of a bug; we observe that  
 984 without explicitly specifying this, model generation outputs tend to have inline comments pointing  
 985 out the bug. We also want to avoid the complexities of identifying and removing such comments  
 986 from a file diff representation. Second, we state that rewrites causing compilation or syntax errors  
 987 (e.g. undeclared variables, function definition modifications) should be avoided because such bugs  
 988 are relatively trivial to solve. We do not experiment extensively with different prompts or generating  
 989 multiple buggy rewrites per function.

990 **Modify existing classes.** This method involves a simple amendment to the function rewriting  
 991 approach. Instead of identifying unique functions (ast.FunctionDef), the codebase traversal logic  
 992 instead looks for classes (ast.ClassDef). Otherwise, all other aspects of the implementation are

993 near identical to function rewriting, with minor changes to the prompt to make bug suggestions and  
 994 the demonstration more class oriented.

995 **Rewrite existing functions.** Instead of providing an LM with the original function, we explore an  
 996 alternative strategy of asking an LM to re-implement a function from scratch. Similar to above, we  
 997 again use the ast library to identify all unique functions. However, instead of directly asking for a  
 998 bug, we remove the function’s implementation, then prompt the LM with the entire file containing  
 999 the function (minus the original implementation). In the task description, we then explicitly ask for  
 1000 the LM to implement the function without changing the function signature.

## 1001 B.2 Procedural Modification

1002 We explore a zero-cost approach to create bugs by performing random modifications to the ast  
 1003 representation of a function or class. A “procedural modification” refers to a function that takes in an  
 1004 ast and applies a fixed transformation to it, such as removing a loop or swapping the blocks of an  
 1005 if/else clause. This strategy is illustrated in Figure 11.

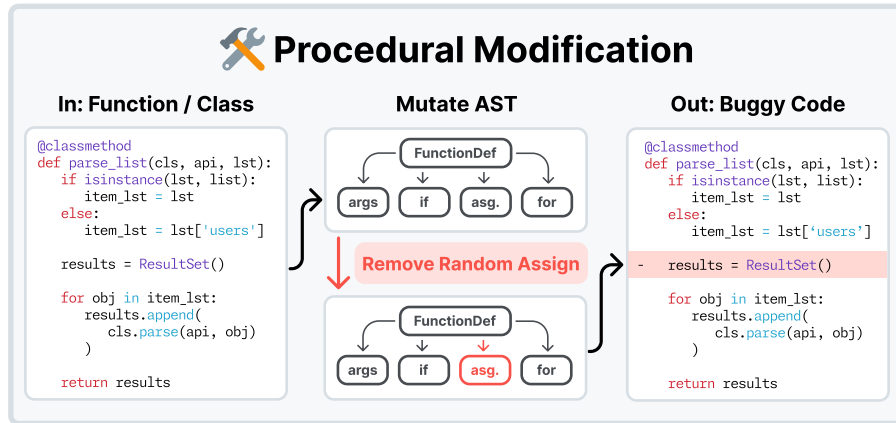

Figure 11: Workflow to generate bugs via procedural modifications. Per function/class, the source code is first convert into an ast. The modification then mutates the ast (e.g. removes an assignment statement). The ast is then converted back into source code with the specific modification introduced.

1006 Similar to the workflow for generating bugs with an LM, we first identify all functions or classes in a  
 1007 repository. Per procedural modification, we first impose a set of criteria that filters out any candidates  
 1008 for which the modification would be impossible. For instance, if the procedural modification removes  
 1009 a random conditional from a function, the modification’s criteria will filter out any candidates that are  
 1010 not functions or do not have a conditional. For the remaining candidates, the procedural modification  
 1011 is applied with controlled likelihood, where `likelihood` is a fraction indicating how often the  
 1012 procedural modification is applied within a candidate. For example, if the procedural modification  
 1013 removes a random function with a `likelihood` of 0.5, then for every conditional declared within  
 1014 the function, there is a 50% chance it gets removed. We introduce `likelihood` so procedural  
 1015 modifications do not lead to changes that are too difficult. Finally, the modified ast is converted back  
 1016 into source code.

1017 Table 7 is a complete list of filtering criteria that is used for any procedural modification. For the  
 1018 `filter_min_complexity` and `filter_max_complexity` criteria, we define a simple definition  
 1019 of “complexity” as a sum of the number of conditional blocks, loops, boolean operators, exception  
 1020 handling blocks, and comparison operators in a function. The purpose of `filter_min_complexity`  
 1021 is to remove both simple, uninteresting functions (e.g. getter, setter methods) from consideration.  
 1022 `filter_max_complexity` is occasionally used to avoid changing long, monolithic functions.

1023 Table 8 is an exhaustive list of all procedural modifications used to create bugs in a codebase.



Table 7: Pool of criteria used to filter for functions or classes with specific properties. Per procedural modification, a subset of these criteria is first used to filter functions and/or classes from a codebase. The modification is then run on the remainder.

| Index | Criteria                | Description                                     |
|-------|-------------------------|-------------------------------------------------|
| 1     | filter_functions        | Is the ast a function definition                |
| 2     | filter_classes          | Is the ast a class definition                   |
| 3     | filter_classes_has_base | Is the ast a class definition with parents      |
| 4     | filter_loops            | Does the ast contain a For or While loop?       |
| 5     | filter_conditionals     | Does the ast contain a conditional block?       |
| 6     | filter_assignments      | Is the ast a function def. with assignments?    |
| 7     | filter_wrappers         | Does the ast contain try or with blocks?        |
| 8     | filter_if_else          | Does the ast contain an if-else block?          |
| 9     | filter_operators        | Does the ast contain binary, boolean operators? |
| 10    | filter_min_complexity   | Is the ast $\geq$ a complexity score?           |
| 11    | filter_max_complexity   | Is the ast $\leq$ a complexity score?           |

### 1024 B.3 Combine Bug Patches

1025 We discuss the two strategies we use to combine bug patches from the same file or the same module.  
 1026 In practice, we combine LM and procedurally generated bugs that have been validated successfully  
 1027 as usable task instances.

1028 **From the same file.** If two or more functions are defined within a single file, this strategy merges  
 1029 the function-level bug patches together. Given  $n$  function-level bugs and  $k$  as the number of bugs to  
 1030 combine, there are  $\binom{n}{k}$  unique file-level candidate bug patches, which can be a large search space to  
 1031 cover. To make the search space tractable, ensure no single function-level bug is repeatedly used,  
 1032 and generate instances that reliably have 1+ Fail to Pass tests, we implement the following approach  
 1033 described in Algorithm 1.

1034 For each file in a codebase, we first identify the function-level bugs (or bug patches) that edit that  
 1035 file. The pool of bugs we draw from have been *validated*, meaning we have already ensured there  
 1036 is 1+ Fail to Pass test(s) associated with the bug. From these pool of file\_bugs, the get\_combos  
 1037 function then generates up to max\_combos sets of bugs, where the size of each set is num\_bugs.  
 1038 For each combo, or set of bugs, the bugs are applied to the codebase one by one. If all patches are  
 1039 successfully combined, this means they were successfully merged, and the merged patch, which

Table 8: The 13 procedural modification techniques we use to create bugs in a codebase. The “Criteria” column contains indices referencing the corresponding filter defined in Table 7. There are four informal categories — Class, Control Flow, Expressions, Removal — which indicates the general type of modification being made.

| Procedural Modification |                  | Criteria | Description                                |
|-------------------------|------------------|----------|--------------------------------------------|
| Class                   | Remove Functions | 2, 10    | Removes method(s) + reference(s).          |
|                         | Remove Parent    | 3, 10    | Removes base class from class header.      |
|                         | Shuffle Methods  | 2, 10    | Shuffles method definitions in a class.    |
| Control Flow            | Invert If/Else   | 8        | Inverts the if-else bodies of a condition. |
|                         | Shuffle Lines    | 11, 12   | Shuffles the lines of a function.          |
| Expressions             | Change Constants | 1, 9, 10 | $\pm 1$ to a constant numeric value.       |
|                         | Break Chains     | 1, 9, 10 | Removes operator(s), operator(s).          |
|                         | Swap Operands    | 1, 9, 10 | Mixes order of operands.                   |
|                         | Change Operator  | 1, 9, 10 | Changes operator(s) (e.g. + to -).         |
| Removal                 | Loops            | 1, 4, 10 | Remove loops (e.g. for, while).            |
|                         | Conditionals     | 1, 5, 10 | Remove conditionals (if).                  |
|                         | Assignments      | 1, 6, 10 | Remove assignment statements.              |
|                         | Wrappers         | 1, 7, 10 | Remove exception (try), context (with).    |



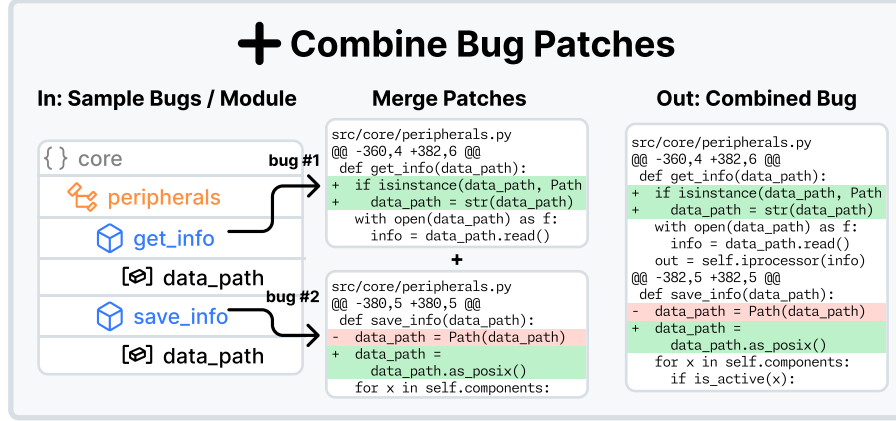

Figure 12: Workflow to generate bugs by combining bug patches. We take  $n$  patches (generated using an LM or procedural modification), then sequentially apply each bug patch to the codebase. If all individual patches apply successfully, we save the resulting single patch which now represents all  $n$  bugs combined.

---

**Algorithm 1** Combine multiple patches from the same file.

---

**Require:** *codebase*, *bugs*; *num\_bugs*, *limit\_per\_file*; *max\_combos*

**Ensure:**  $\text{min\_bugs} \geq 2$ ;

$\text{max\_bugs} \geq \text{min\_bugs}$ ;

**procedure** COMBINEFILEBUGS

**for each** *file* **in** *codebase* **do**

*file\_bugs*  $\leftarrow$  bugs that apply to *file*

*combinations*  $\leftarrow$  get\_combos(*file\_bugs*, *num\_bugs*, *max\_combos*)

**for each** *combo* **in** *combinations* **do**

      Apply *combo* to *codebase*

**if** success **then**

        Save *combo* to disk

**if** *limit\_per\_file* reached **then**

**break**

**end if**

*combinations*  $\leftarrow$  [*c* for *c* in *combinations* if  $c \cap \text{combo} = \emptyset$ ]

**end if**

**end for**

**end for**

**end procedure**

---

1040 consists of multiple function-level bugs, is saved and re-validated as a single bug. Merging patches  
 1041 occasionally fails if there is an overlapping conflict between two files, akin to a merge conflict with  
 1042 `git`; this usually happens when a function is declared within another. To ensure a function-level bug  
 1043 is only used once, any remaining bug sets in *combinations* using any patch in *combo* are removed.

1044 The *limit\_per\_file* and *max\_combos* parameters prevent any one file from being over-represented  
 1045 and constrains an otherwise combinatorial large search space. We run this algorithm across all code-  
 1046 base files, typically setting *num\_bugs*= [2, 4], *limit\_per\_file*= 3, *max\_combos*= 40. Decreasing  
 1047 *num\_bugs* or increasing the other three parameters improves the yield.

1048 **From the same module.** There are several ways one could imagine composing function-level bugs  
 1049 from multiple bugs, such as combining those that break the same test or have a programmatic relation-  
 1050 ship (e.g. function *a* calls function *b*). We found a relatively straightforward and effective approach  
 1051 to be combining files that edit the same “module”. By “module” we are referring to a subdirectory  
 1052 within the source code (e.g. `sklearn/feature_extraction`, `astropy/convolution`). Out of all  
 1053 SWE-bench instances that edit 2+ files, 75% modify files within the same submodule, suggesting  
 1054 a high degree of intra-module code changes. The implementation for our approach is described in  
 1055 Algorithm 2

---

**Algorithm 2** Combine multiple patches from the same module.

---

**Require:** *bugs*; *num\_bugs*; *limit\_per\_module*; *max\_combos*; *depth*

**Ensure:**  $num\_bugs \geq 2$ ;

**procedure** COMBINEMODULEBUGS

$map\_path\_to\_bugs \leftarrow \{\}$

**for each** *bug* **in** *bugs* **do**

$path \leftarrow get\_path\_from(bug)$

$map\_path\_to\_patches[path] \leftarrow [bug]$

**end for**

    Collapse nested paths based on *depth*

**for all** (*path*, *patches*) **in** *map\_path\_to\_patches* **do**

$combinations \leftarrow get\_combos(patches, num\_bugs, max\_combos)$

**for each** *combo* **in** *combinations* **do**

            Apply *combo* to *codebase*

**if** success and  $num\_files\_changed(combo) \geq 2$  **then**

                Save *combo* to disk

**if** *limit\_per\_module* reached **then**

**break**

**end if**

$combinations \leftarrow [c \text{ for } c \text{ in } combinations \text{ if } c \cap combo = \emptyset]$

**end if**

**end for**

**end for**

**end procedure**

---

1056 The implementation for this approach is similar to Algorithm 1 with two key changes. First,  
1057 we do not do file-by-file or folder-by-folder traversal. Instead, using the diff patches, we cre-  
1058 ate a dictionary *map\_path\_to\_bugs* that mimics the file structure of a codebase. For example,  
1059 if bug modifies path *a/b/c/d.py*, it is represented as *map\_path\_to\_bugs[a][b][c][d.py] =*  
1060 *[bug]*. Additional bugs that modify the same path are appended to the list. Since every bug is  
1061 a function-level bug, there will never be a bug registered in multiple lists. We then “collapse”  
1062 up to *depth* indices. So for instance, at *depth = 3*, the above data structure is collapsed into  
1063 *map\_path\_to\_bugs[a/b/c][d.py] = [bug]*. Finally, any nested dictionaries are collapsed into  
1064 a single list of patches (e.g. *map\_path\_to\_bugs[a/b/c] = [bug]*). Mirroring the procedure in  
1065 Algorithm 1, we then iterate across this dictionary’s values (lists of bugs). Second, we only save  
1066 patches that modify 2+ files; aggregate bugs (represented by *combo*) modifying a single file are not  
1067 considered.

1068 Again, we run this strategy across all 100 repositories, with parameters *num\_bugs*= [2, 5],  
1069 *limit\_per\_module*= 10, *max\_combos*= 100, and *depth*= 2. Reducing *num\_bugs*, *depth* and  
1070 increasing the other parameters yields more bugs. We choose a *depth* of 2 because empirically,  
1071 we find that meaningful modules are usually declared as immediate sub-folders of the main source  
1072 code folder (e.g. in *sklearn/feature\_extraction*, *sklearn* is the source code folder while  
1073 *feature\_extraction* is the module). A shallower *depth* leads to less meaningful groupings, while  
1074 yield decreases significantly for every increased level of *depth*, particularly for smaller repositories.

#### 1075 B.4 Pull Request Mirroring

1076 We finally discuss the fourth and last strategy for generating bugs - mirroring real world pull requests  
1077 (PR). We visualize this process in Figure 13.

1078 **Why use an LM?** When we initially implemented this approach, we attempted to directly perform  
1079 a `git apply -reverse [patch]` on the codebase. However, for the large majority of patches,  
1080 this fails. We performed troubleshooting by inspecting 100 PR patches on the *sqlfluff/sqlfluff*  
1081 repository, leading us to two observations.

- 1082 1. The majority of these PRs reflect changes that remain present in the codebase today (making  
1083 the bug creation promising).
- 1084 2. However, many patches can not be reversed because the exact location (e.g. lines, file) of  
1085 the relevant code changed because of other changes.

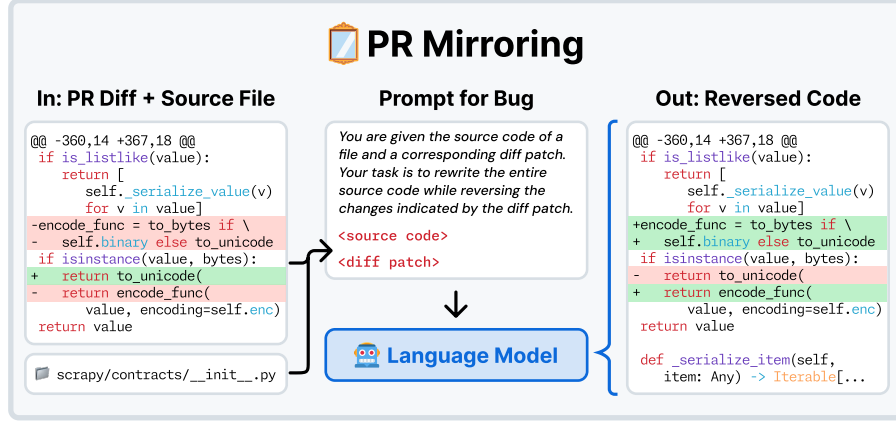

Figure 13: Workflow to generate bugs by reverting changes made in the diff patch corresponding to a real GitHub pull request (PR). Given the patch and the files modified by the patch, we prompt the LM to generate a complete rewrite of each file that *reverses* the changes made in the PR. The changes are applied to the codebase, and we extract the patch, which now captures the reversal of the PR changes.

Therefore, we employ LMs to perform patch reversal, and find that reasoning models (e.g. o3-mini [28]) are particularly effective.

**Description of method.** We follow SWE-bench’s methodology for crawling PRs created January 1st, 2023 and onwards, with minor and arbitrary exceptions for some repositories where we crawl older PRs as well. Per PR, we iterate across the file(s) changed by the patch. Per file, we prompt an LM with the file-specific changes from the patch along with the file’s source code in the current state of the repository (*not* the repository’s state corresponding to when the PR was applied, referred to as the `base_commit` in SWE-bench). The LM is asked to generate a rewrite of the file that reverts the changes reflected in the PR. We aggregate the changes across all file(s) into a single patch.

Because we are interested in problems that our expert trajectory generation method (SWE-agent + Claude 3.7 Sonnet) has a chance of solving, we do not attempt to reproduce PRs that change more than 8 files. This constraint is imposed because no SWE-bench instance that edits more than 6 files has ever been solved [17].

**How well does PR mirroring work?** We scrape the PRs corresponding to 100 randomly selected SWE-bench task instances from the `django/django` GitHub repository and attempt to recreate these task instances with SWE-smith’s collection process. We successfully recovered 92 of 100 task instances. Of these, 84 break identical F2P test(s), with the remaining 8 breaking a subset because some tests were removed over time. This sanity check gives us confidence that the PR mirroring strategy lives up to its name.

**Comparison to SWE-bench.** This approach has several benefits and drawbacks compared to SWE-bench’s collection pipeline. First, it removes the need to create instance-specific Docker images — all PRs are mirrored against the same version of a repository. This also implies that there is no need to write installation specifications for past versions of a repository, which is typically the most laborious step in task construction with SWE-bench. Finally, this strategy also allows us to loosen the requirements on what PRs we attempt to convert into a task instance. In SWE-bench, the core requirements for what PRs to attempt to convert into a task instance include:

1. It must edit 1+ code files (e.g. not just `.md`, `.rst` files).
2. It must reference 1+ GitHub issues, which serves as the problem statement.
3. It must edit 1+ testing related files (1+ files with a `test`-adjacent keyword in it).

With this collection strategy and SWE-smith’s focus on training data, the second and third requirements are no longer necessary. If there is no associated issue, issue text can simply be generated. If the patch does not contain any testing related changes, this is tolerable, as the validation stage will determine whether the PR breaks any tests. With these considerations, we purport that SWE-smith’s PR mirroring strategy can re-purpose a higher percentage of real world code changes for training purposes.

1121 The main downside is that the rest of the repository is out of sync with the state of the codebase  
1122 when the PR was applied. As a result, it's possible that changes in the behavior of the rest of the  
1123 codebase may affect the issue's reproducibility or the accuracy of the issue description (e.g. line  
1124 numbers referenced in the issue text are likely somewhat off with respect to the codebase). However,  
1125 a simple mitigation for this is to create a Docker image for a repository at an earlier commit that's  
1126 closer to the original creation date of the issue. While we do not carry out a targeted experiment, we  
1127 hypothesize that using SWE-smith, we would be able to reproduce SWE-bench entirely with 10x less  
1128 human hours with an estimated  $2294 \times \$0.055 = \$126.17$  in costs.

## 1129 C Issue Generation

1130 We cover the four issue generation strategies we experiment with to determine issue text's effect on  
1131 how solvable a SWE-smith instance is along with the trajectory's value as a training data point.

1132 **Generated with LM.** We prompt an LM with a randomly selected SWE-bench Verified problem  
1133 statement, the bug patch, list of Fail-to-Pass tests, source code for one Fail-to-Pass test, and the  
1134 execution logs of running all the Fail-to-Pass tests. We ask the LM to generate an issue that describes  
1135 the bug conveyed in the patch in the style of the SWE-bench Verified demonstration. Figure C shows  
1136 the system prompt for this strategy.

### System prompt for generating issues with an LM

You are a software engineer helping to create a realistic dataset of synthetic GitHub issues.

You will be given the following input:

1. Demonstration: A realistic GitHub issue to mimic (included in the `<demonstration>` tag).
2. Patch: A git diff output/PR changes that introduces a bug (included in the `<patch>` tag).
3. Test output: The output of running the tests after the patch is applied (included in the `<test_output>` tag).
4. Test source code: Source code for one or more tests that failed (included in the `<test_source_code>` tag).

Output: A realistic GitHub issue for the patch.

Guidelines:

- Mimic the style and structure of the demonstration issues. If the demonstration issues are not well structured, your output should also be not well structured. If the demonstrations use improper or no markdown, your output should also use improper or no markdown. If the demonstrations are short/long, your output should also be short/long (if possible). If the demonstrations include human "flavor text" or "fluff", your output should also include human "flavor text" or "fluff". Do this even if it conflicts with your default behavior of trying to be extremely concise and helpful.
  - DO NOT explain the fix/what caused the bug itself, focus on how to reproduce the issue it introduces
  - Do not mention pytest or what exact test failed. Instead, generate a realistic issue.
  - If possible, include information about how to reproduce the issue. An ideal reproduction script should raise an error or print an unexpected output together with the expected output.
- However, still include this information in a style very similar to the demonstration issues.

1137  
1138 **Fixed issue templates.** We create a set of 7 pre-defined issue templates, listed in Table 9. Each  
1139 template uses information from the bug patch or Fail-to-Pass tests associated with every task instance.  
1140 Given a dataset of task instances, we randomly select one of the templates to use as the problem  
1141 statement according to the probabilities listed in Table 9. The reason we assign the highest likelihood  
1142 for the prompt that provides all four categories of information (bug type, files changed, functions  
1143 changed, Fail-to-Pass tests) is to ensure that a higher proportion of task instances are well-specified.

1144 **Fail-to-Pass test code and execution logs.** Another approach is showing the source code and test  
1145 execution logs for a randomly selected Fail-to-Pass test. This approach is motivated by the lack of  
1146 reproduction code or expected/actual behavior of code communicated with fixed issue templates. We  
1147 show code and execution logs only for a single Fail-to-Pass test; if a task instance has more than one  
1148 Fail-to-Pass test, we do not disclose remaining tests.

Table 9: List of issue text templates we use to generate problem statements. Across all templates, four types of information are included — the files with bugs, functions with bugs, Fail-to-Pass test(s), and the type of bug. Templates that offer less information are generally assigned a lower probability.

| Template                           | Prob. | Information Provided                                                                  |
|------------------------------------|-------|---------------------------------------------------------------------------------------|
| Basic                              | 0.05  | None                                                                                  |
| Files                              | 0.1   | States which file(s) have bug(s).                                                     |
| Funcs                              | 0.15  | States which file(s) and func(s) have bug(s).                                         |
| Tests                              | 0.1   | States that some tests are failing.                                                   |
| F2P Tests                          | 0.1   | States which tests are failing.                                                       |
| Bug Type                           | 0.05  | States failure type.                                                                  |
| Bug Type + Files                   | 0.15  | States failure type and which file(s) have bug(s)                                     |
| Bug Type + Files<br>+ Test         | 0.15  | States failure type, which file(s) have bug(s),<br>and a random F2P test.             |
| Bug Type + Files<br>+ Funcs + Test | 0.15  | States failure type, which file(s) and func(s)<br>have bug(s), and a random F2P test. |

1149 **Original issue text.** This strategy works exclusively for some task instances generated using PR  
1150 Mirroring. If a PR is successfully mirrored, we use the text from the associated issues as the problem  
1151 statement, exactly as done in SWE-bench. Of the 2345 task instances represented in SWE-smith  
1152 mirrored from real-world PRs, 708 or 30.19% of these have one or more associated GitHub issue(s)  
1153 to create a SWE-bench style problem statement.

## 1154 D Dataset Statistics

1155 We present additional breakdowns and analyses of the SWE-smith dataset, focusing on the kinds of  
1156 repositories and bugs that are represented.

1157 **Repository categorization.** We present an exhaustive list of repositories used in SWE-smith in  
1158 Table D. We categorize the repositories into seven general buckets: Data Parsing and Transformation  
1159 (39), Web & API Development (11), Code Quality & Testing (12), Visualization & Presentation  
1160 (8), System Tools & Protocols (17), Natural Language Processing (7), and Miscellaneous (6). The  
1161 categorizations were performed by first, determining an appropriate set of categories based on manual  
1162 inspection supported by the descriptions and GitHub topics associated with each repository. After  
1163 settling upon the buckets, we asked GPT-4o to provide a label based on the repository’s metadata and  
1164 README dump. SWE-smith represents a wider and more variegated coverage of software tools and  
1165 applications compared to any prior works.

| Repository                      | Description                                                                                                                                            |
|---------------------------------|--------------------------------------------------------------------------------------------------------------------------------------------------------|
| <i>Code Quality and Testing</i> |                                                                                                                                                        |
| PyCQA/flake8                    | flake8 is a python tool that glues together pycodestyle, pyflakes, mccabe, and third-party plugins to check the style and quality of some python code. |
| Suor/fancy                      | A fancy and practical functional tools                                                                                                                 |
| adrienverge/yamllint            | A linter for YAML files.                                                                                                                               |
| agronholm/typeguard             | Run-time type checker for Python                                                                                                                       |
| cknd/stackprinter               | Debugging-friendly exceptions for Python                                                                                                               |
| cool-RR/PySnooper               | Never use print for debugging again                                                                                                                    |
| getmoto/moto                    | A library that allows you to easily mock out tests based on AWS infrastructure.                                                                        |
| pylint-dev/astroid              | A common base representation of python source code for pylint and other projects                                                                       |
| pytest-dev/iniconfig            | None                                                                                                                                                   |
| python/mypy                     | Optional static typing for Python                                                                                                                      |

*Continued on next page*

| Repository                             | Description                                                                                                                                                                                                                     |
|----------------------------------------|---------------------------------------------------------------------------------------------------------------------------------------------------------------------------------------------------------------------------------|
| pyupio/safety                          | Safety checks Python dependencies for known security vulnerabilities and suggests the proper remediations for vulnerabilities detected.                                                                                         |
| pyutils/line_profiler                  | Line-by-line profiling for Python                                                                                                                                                                                               |
| rubik/radon                            | Various code metrics for Python code                                                                                                                                                                                            |
| spulec/freezegun                       | Let your Python tests travel through time                                                                                                                                                                                       |
| sqlfluff/sqlfluff                      | A modular SQL linter and auto-formatter with support for multiple dialects and templated code.                                                                                                                                  |
| <i>Data Parsing and Transformation</i> |                                                                                                                                                                                                                                 |
| alecthomas/voluptuous                  | CONTRIBUTIONS ONLY: Voluptuous, despite the name, is a Python data validation library.                                                                                                                                          |
| andialbrecht/sqlparse                  | A non-validating SQL parser module for Python                                                                                                                                                                                   |
| bury/python-readability                | fast python port of arc90's readability tool, updated to match latest readability.js!                                                                                                                                           |
| burnash/gspread                        | Google Sheets Python API                                                                                                                                                                                                        |
| chardet/chardet                        | Python character encoding detector                                                                                                                                                                                              |
| cloudpipe/cloudpickle                  | Extended pickling support for Python objects                                                                                                                                                                                    |
| dask/dask                              | Parallel computing with task scheduling                                                                                                                                                                                         |
| datamade/usaddress                     | :us: a python library for parsing unstructured United States address strings into address components                                                                                                                            |
| davidhalter/parso                      | A Python Parser                                                                                                                                                                                                                 |
| erikrose/parsimonious                  | The fastest pure-Python PEG parser I can muster                                                                                                                                                                                 |
| facelessuser/soupsieve                 | A modern CSS selector implementation for BeautifulSoup                                                                                                                                                                          |
| gawel/pyquery                          | A jquery-like library for python                                                                                                                                                                                                |
| google/textfsm                         | Python module for parsing semi-structured text into python tables.                                                                                                                                                              |
| gruns/furl                             | URL parsing and manipulation made easy.                                                                                                                                                                                         |
| gweis/isodate                          | ISO 8601 date/time parser                                                                                                                                                                                                       |
| hukkin/tomli                           | A lil' TOML parser                                                                                                                                                                                                              |
| jawah/charset_normalizer               | Truly universal encoding detector in pure Python                                                                                                                                                                                |
| john-kurkowski/tldextract              | Accurately separates a URL's subdomain, domain, and public suffix, using the Public Suffix List (PSL).                                                                                                                          |
| joke2k/faker                           | Faker is a Python package that generates fake data for you.                                                                                                                                                                     |
| jsvine/pdfplumber                      | Plumb a PDF for detailed information about each char, rectangle, line, et cetera — and easily extract text and tables.                                                                                                          |
| kayak/pypika                           | PyPika is a python SQL query builder that exposes the full richness of the SQL language using a syntax that reflects the resulting query. PyPika excels at all sorts of SQL queries but is especially useful for data analysis. |
| keleshev/schema                        | Schema validation just got Pythonic                                                                                                                                                                                             |
| kennethreitz/records                   | SQL for Humans™                                                                                                                                                                                                                 |
| kurtmckee/feedparser                   | Parse feeds in Python                                                                                                                                                                                                           |
| lepture/mistune                        | A fast yet powerful Python Markdown parser with renderers and plugins.                                                                                                                                                          |
| madzak/python-json-logger              | Json Formatter for the standard python logger                                                                                                                                                                                   |
| mahmoud/glom                           | Python's nested data operator (and CLI), for all your declarative restructuring needs. Got data? Glom it!                                                                                                                       |
| marshmallow-code/marshmallow           | A lightweight library for converting complex objects to and from simple Python datatypes.                                                                                                                                       |
| martinblech/xmltodict                  | Python module that makes working with XML feel like you are working with JSON                                                                                                                                                   |
| matthewwithanm/python-markdownify      | Convert HTML to Markdown                                                                                                                                                                                                        |
| mewwts/addict                          | The Python Dict that's better than heroin.                                                                                                                                                                                      |
| mido/mido                              | MIDI Objects for Python                                                                                                                                                                                                         |

*Continued on next page*

| Repository                           | Description                                                                                                                                                                                |
|--------------------------------------|--------------------------------------------------------------------------------------------------------------------------------------------------------------------------------------------|
| modin-project/modin                  | Modin: Scale your Pandas workflows by changing a single line of code                                                                                                                       |
| mozilla/bleach                       | Bleach is an allowed-list-based HTML sanitizing library that escapes or strips markup and attributes                                                                                       |
| msiemens/tinydb                      | TinyDB is a lightweight document oriented database optimized for your happiness :)                                                                                                         |
| pandas-dev/pandas                    | Flexible and powerful data analysis / manipulation library for Python, providing labeled data structures similar to R data.frame objects, statistical functions, and much more             |
| pdfminer/pdfminer.six                | Community maintained fork of pdfminer - we fathom PDF                                                                                                                                      |
| pudo/dataset                         | Easy-to-use data handling for SQL data stores with support for implicit table creation, bulk loading, and transactions.                                                                    |
| pydantic/pydantic                    | Data validation using Python type hints                                                                                                                                                    |
| pydata/patsy                         | Describing statistical models in Python using symbolic formulas                                                                                                                            |
| pydicom/pydicom                      | Read, modify and write DICOM files with python code                                                                                                                                        |
| pygments/pygments                    | Pygments is a generic syntax highlighter written in Python                                                                                                                                 |
| pyparsing/pyparsing                  | Python library for creating PEG parsers                                                                                                                                                    |
| python-jsonschema/jsonschema         | An implementation of the JSON Schema specification for Python                                                                                                                              |
| python-openxml/python-docx           | Create and modify Word documents with Python                                                                                                                                               |
| rlchardj/on3s/parse                  | Parse strings using a specification based on the Python format() syntax.                                                                                                                   |
| scanny/python-pptx                   | Create Open XML PowerPoint documents in Python                                                                                                                                             |
| scrapy/scrapy                        | Scrapy, a fast high-level web crawling & scraping framework for Python.                                                                                                                    |
| seperman/deepdiff                    | DeepDiff: Deep Difference and search of any Python object/data.<br>DeepHash: Hash of any object based on its contents. Delta: Use deltas to reconstruct objects by adding deltas together. |
| sloria/environs                      | simplified environment variable parsing                                                                                                                                                    |
| sunpy/sunpy                          | SunPy - Python for Solar Physics                                                                                                                                                           |
| tkrajina/gpxpy                       | gpx-py is a python GPX parser. GPX (GPS eXchange Format) is an XML based file format for GPS tracks.                                                                                       |
| tobymao/sqlglot                      | Python SQL Parser and Transpiler                                                                                                                                                           |
| un33k/python-slugify                 | Returns unicode slugs                                                                                                                                                                      |
| <i>Machine Learning and AI</i>       |                                                                                                                                                                                            |
| facebookresearch/fvcore              | Collection of common code that's shared among different research projects in FAIR computer vision team.                                                                                    |
| facebookresearch/hydra               | Hydra is a framework for elegantly configuring complex applications                                                                                                                        |
| HIPS/autograd                        | Efficiently computes derivatives of NumPy code.                                                                                                                                            |
| iterative/dvc                        | Data Versioning and ML Experiments                                                                                                                                                         |
| jaraco/infect                        | Correctly generate plurals, ordinals, indefinite articles; convert numbers to words                                                                                                        |
| life4/textdistance                   | Compute distance between sequences. 30+ algorithms, pure python implementation, common interface, optional external libs usage.                                                            |
| luozhouyang/python-string-similarity | A library implementing different string similarity and distance measures using Python.                                                                                                     |
| Mimino666/langdetect                 | Port of Google's language-detection library to Python.                                                                                                                                     |
| mozillazg/python-pinyin              | 汉字转拼音(pypinyin)                                                                                                                                                                            |
| pndurette/gTTS                       | Python library and CLI tool to interface with Google Translate's text-to-speech API                                                                                                        |
| Project-MONAI/MONAI                  | AI Toolkit for Healthcare Imaging                                                                                                                                                          |
| seatgeek/thefuzz                     | Fuzzy String Matching in Python                                                                                                                                                            |

*Continued on next page*



| Repository                            | Description                                                                                                                                                                                                                                                                                      |
|---------------------------------------|--------------------------------------------------------------------------------------------------------------------------------------------------------------------------------------------------------------------------------------------------------------------------------------------------|
| vi3k6i5/flashtext                     | Extract Keywords from sentence or Replace keywords in sentences.                                                                                                                                                                                                                                 |
| <i>System Tools and Protocols</i>     |                                                                                                                                                                                                                                                                                                  |
| agronholm/exceptiongroup              | Backport of PEP 654 (exception groups)                                                                                                                                                                                                                                                           |
| aio-lib/async-timeout                 | asyncio-compatible timeout class                                                                                                                                                                                                                                                                 |
| arrow-py/arrow                        | Better dates & times for Python                                                                                                                                                                                                                                                                  |
| borntyping/python-colorlog            | A colored formatter for the python logging module                                                                                                                                                                                                                                                |
| cantools/cantools                     | CAN bus tools.                                                                                                                                                                                                                                                                                   |
| conan-io/conan                        | Conan - The open-source C and C++ package manager                                                                                                                                                                                                                                                |
| cookiecutter/cookiecutter             | A cross-platform command-line utility that creates projects from cookiecutters (project templates), e.g. Python package projects, C projects.                                                                                                                                                    |
| dbader/schedule                       | Python job scheduling for humans.                                                                                                                                                                                                                                                                |
| gruns/icecream                        | Never use print() to debug again.                                                                                                                                                                                                                                                                |
| jd/tenacity                           | Retrying library for Python                                                                                                                                                                                                                                                                      |
| mahmoud/boltons                       | Like builtins, but boltons. 250+ constructs, recipes, and snippets which extend (and rely on nothing but) the Python standard library. Nothing like Michael Bolton.                                                                                                                              |
| oauthlib/oauthlib                     | A generic, spec-compliant, thorough implementation of the OAuth request-signing logic                                                                                                                                                                                                            |
| pallets/click                         | Python composable command line interface toolkit                                                                                                                                                                                                                                                 |
| paramiko/paramiko                     | The leading native Python SSHv2 protocol library.                                                                                                                                                                                                                                                |
| pexpect/ptyprocess                    | Run a subprocess in a pseudo terminal                                                                                                                                                                                                                                                            |
| pyasn1/pyasn1                         | Generic ASN.1 library for Python                                                                                                                                                                                                                                                                 |
| pyca/pyopenssl                        | A Python wrapper around the OpenSSL library                                                                                                                                                                                                                                                      |
| python-hyper/h11                      | A pure-Python, bring-your-own-I/O implementation of HTTP/1.1                                                                                                                                                                                                                                     |
| python-trio/trio                      | Trio – a friendly Python library for async concurrency and I/O                                                                                                                                                                                                                                   |
| rustedpy/result                       | NOT MAINTAINED - A simple Rust like Result type for Python 3. Fully type annotated.                                                                                                                                                                                                              |
| termcolor/termcolor                   | ANSI color formatting for output in terminal                                                                                                                                                                                                                                                     |
| theskumar/python-dotenv               | Reads key-value pairs from a .env file and can set them as environment variables. It helps in developing applications following the 12-factor principles.                                                                                                                                        |
| tox-dev/pipdeptree                    | A command line utility to display dependency tree of the installed Python packages                                                                                                                                                                                                               |
| <i>Visualization and Presentation</i> |                                                                                                                                                                                                                                                                                                  |
| amueller/word_cloud                   | A little word cloud generator in Python                                                                                                                                                                                                                                                          |
| lincolnloop/python-qrcode             | Python QR Code image generator                                                                                                                                                                                                                                                                   |
| prettytable/prettytable               | Display tabular data in a visually appealing ASCII table format                                                                                                                                                                                                                                  |
| pwaller/pyfiglet                      | An implementation of figlet written in Python                                                                                                                                                                                                                                                    |
| rsalmei/alive-progress                | A new kind of Progress Bar, with real-time throughput, ETA, and very cool animations!                                                                                                                                                                                                            |
| weaveworks/grafanalib                 | Python library for building Grafana dashboards                                                                                                                                                                                                                                                   |
| <i>Web and API Development</i>        |                                                                                                                                                                                                                                                                                                  |
| Cog-Creators/Red-DiscordBot           | A multi-function Discord bot                                                                                                                                                                                                                                                                     |
| Knio/dominate                         | Dominate is a Python library for creating and manipulating HTML documents using an elegant DOM API. It allows you to write HTML pages in pure Python very concisely, which eliminate the need to learn another template language, and to take advantage of the more powerful features of Python. |
| alanjds/drf-nested-routers            | Nested Routers for Django Rest Framework                                                                                                                                                                                                                                                         |

*Continued on next page*

| Repository                | Description                                                                                                                                                                               |
|---------------------------|-------------------------------------------------------------------------------------------------------------------------------------------------------------------------------------------|
| benoitc/gunicorn          | gunicorn 'Green Unicorn' is a WSGI HTTP Server for UNIX, fast clients and sleepy applications.                                                                                            |
| bottlepy/bottle           | bottle.py is a fast and simple micro-framework for python web-applications.                                                                                                               |
| django-money/django-money | Money fields for Django forms and models.                                                                                                                                                 |
| django/channels           | Developer-friendly asynchrony for Django                                                                                                                                                  |
| django/daphne             | Django Channels HTTP/WebSocket server                                                                                                                                                     |
| encode/starlette          | The little ASGI framework that shines.                                                                                                                                                    |
| getnikola/nikola          | A static website and blog generator                                                                                                                                                       |
| graphql-python/graphene   | GraphQL framework for Python                                                                                                                                                              |
| marshmallow-code/apispec  | A pluggable API specification generator. Currently supports the OpenAPI Specification (f.k.a. the Swagger specification)..                                                                |
| marshmallow-code/webargs  | A friendly library for parsing HTTP request arguments, with built-in support for popular web frameworks, including Flask, Django, Bottle, Tornado, Pyramid, webapp2, Falcon, and aiohttp. |
| pallets/jinja             | A very fast and expressive template engine.                                                                                                                                               |
| pallets/markupsafe        | Safely add untrusted strings to HTML/XML markup.                                                                                                                                          |
| tornadoweb/tornado        | Tornado is a Python web framework and asynchronous networking library, originally developed at FriendFeed.                                                                                |
| tweepy/tweepy             | Twitter for Python!                                                                                                                                                                       |

## D.1 Bug Generation Statistics

We provide extensive details about different aspects of each of the bug generation strategies, including the yield rates, labor/monetary costs, and dataset characterizations.

**Yield rates.** In Table 11, we provide the yield rates for each bug generation method across all repositories in SWE-smith. In general, we find that the PR Mirroring has the lowest yield rate at 13.18% (although this rate is somewhat higher than SWE-bench’s yield rate of  $2294/93139 = 2.46\%$ ). For using LMs to generate bugs, modifying functions to introduce bugs intentionally has a higher yield than asking LMs to perform a best-effort rewrite. The efficacy of Procedural Modifications varies by strategy. For instance, shuffling the functions declared in a class only breaks existing test(s) 1.93% of the time, but inverting a conditional will lead to a task instance for 47.04% of modifications. Finally, combining bug patches has an extremely high yield rate - this is to be expected because we only attempt to combine bug patches that have been validated as usable task instances breaking 1+ tests.

The number of repositories captured by each bug generation technique varies due to each strategy’s specific preconditions, which at times may not be effective for some repositories. For instance, the *Procedural (Class \*)* set of methods only mutates Python classes. This strategy is fruitless for the minority of SWE-smith repositories that do not define any classes. The *Procedural (Op Break Chains)* method randomly removes operations and operands from expressions with two or more operations (e.g.  $a + b + c \rightarrow a + b$ ) — such expressions are not always present in SWE-smith repositories.

The collective yield rate across SWE-smith’s bug generation strategies is significantly higher than SWE-bench’s collection strategy.

The yield rate also varies with respect to the repository it is being applied to. We provide a summary of yield rates by repository in Table 12. We generally observe that lower test coverage correlates with a lower yield rate.

**Dataset characterizations.** In Table 13, we provide statistics about the validated task instances produced by different bug generation strategies. Our work’s LM-based strategies rewrite one function in one file. Procedural modifications will also only change one file, but depending on the strategy, 1+ functions or classes may be changed. Combining multiple patches from the same file always produces a patch with 2+ functions edited. Combining across modules produces a patch with 2+ files edited. The targeted nature of each of the bug creation strategies is reflected in the typical number of functions and files that the bugs produced by each strategy edits.

Table 11: Yield rates for different bug generation strategies covered in Section B. We show the number of repositories that each strategy was run on, the number of bug candidates generated by each strategy, and the number of instances, or the number of candidates that were validated to have 1+ Fail to Pass test. The yield rate for

| Strategy                         | # Repos | # Candidates | # Instances | Yield Rate |
|----------------------------------|---------|--------------|-------------|------------|
| Combine (file)                   | 124     | 6020         | 5865        | 97.43%     |
| Combine (module)                 | 65      | 4396         | 4227        | 96.16%     |
| LM (Modify)                      | 108     | 31950        | 17887       | 55.98%     |
| LM (Rewrite)                     | 128     | 11908        | 4173        | 35.04%     |
| PR Mirroring                     | 108     | 6934         | 2344        | 33.8%      |
| Procedural (Class Rm Base)       | 103     | 1401         | 463         | 33.05%     |
| Procedural (Class Rm Funcs)      | 103     | 2506         | 1180        | 47.09%     |
| Procedural (Class Shuffle Funcs) | 103     | 2504         | 47          | 1.88%      |
| Procedural (Ctrl Invert If)      | 105     | 4695         | 2321        | 49.44%     |
| Procedural (Ctrl Shuffle)        | 104     | 9055         | 4015        | 44.34%     |
| Procedural (Op Break Chains)     | 71      | 747          | 225         | 30.12%     |
| Procedural (Op Change Const)     | 77      | 723          | 257         | 35.55%     |
| Procedural (Op Change)           | 81      | 1507         | 450         | 29.86%     |
| Procedural (Op Swap)             | 87      | 2141         | 483         | 22.56%     |
| Procedural (Remove Assign)       | 121     | 5470         | 2661        | 48.65%     |
| Procedural (Remove Cond)         | 120     | 5288         | 2311        | 43.7%      |
| Procedural (Remove Loop)         | 110     | 1945         | 860         | 44.22%     |
| Procedural (Remove Wrapper)      | 80      | 884          | 368         | 41.63%     |
| All                              | 129     | 100074       | 50137       | 50.1%      |

Table 12: Yield rates for different repositories represented in SWE-smith.

| Yield Rate | # of Repositories |
|------------|-------------------|
| 0-25%      | 10                |
| 25-50%     | 31                |
| 50-75%     | 60                |
| 75-100%    | 27                |

In Figure I4, we show the distributions for different attributes of SWE-smith compared to other SWE-bench style datasets. Compared to prior works, there is a much higher proportion of task instances with more than one Fail-to-Pass test. For any one repository, we find that SWE-smith task instances collectively cause failures for a much higher percentage of the testing suit than other datasets; a potential benefit of this is that training on SWE-smith based trajectories may expose models to a much broader set of functionalities in a codebase. The number of lines and files edited by SWE-smith task instances is highly similar to the trend lines for SWE-bench Verified.

We note that unlike other datasets, the trend line of SWE-smith task instances is “adjustable”. In other words, the Figure I4 distributions are a capture of the task instances provided in this release of SWE-smith. However, because of SWE-smith’s flexible bug creation techniques, the distribution can be “shaped” if needed. For instance, generating more task instances using the bug patch combination method would shift all three curves in Figure I4. We make this point to highlight the fact that the attributes of SWE-bench task instances are, in a sense, constrained by real world software development behavior. On the other hand, SWE-smith can be used to break tests and code that may not be reflected at all in any existing pull request. In this sense, we argue that LMs trained on SWE-smith have better “exposure” to a codebase compared to exclusively training on pull requests.

**Continuation of scaling execution environments.** The validation and evaluation procedures for SWE-smith deviate slightly from SWE-bench’s harnesses. The main reasons for these differences can largely be attributed to the granularity of installation specifications. In SWE-bench, each task instance corresponds to a unique base commit, with additional `version` and `environment_setup_commit` keys needed as indirection for mapping an instance to the correct set of installation and testing

Table 13: Statistics for attributes of a SWE-smith task instance across different bug generation strategies, reported as *median (IQR)*, where IQR is the inter-quartile range (25th–75th percentile).

| Strategy     | # Instances | # F2P     | $\Delta$ Lines | $\Delta$ Functions | $\Delta$ Files |
|--------------|-------------|-----------|----------------|--------------------|----------------|
| Combine      | 10092       | 15 (5-48) | 19 (12-36)     | 2 (2-3)            | 1 (1-2)        |
| LM           | 22060       | 4 (1-17)  | 6 (3-15)       | 1 (1-1)            | 1 (1-1)        |
| PR Mirroring | 2344        | 3 (1-14)  | 20 (8-55)      | 2 (2-4)            | 1 (1-2)        |
| Procedural   | 15641       | 7 (2-32)  | 7 (5-15)       | 1 (1-1)            | 1 (1-1)        |

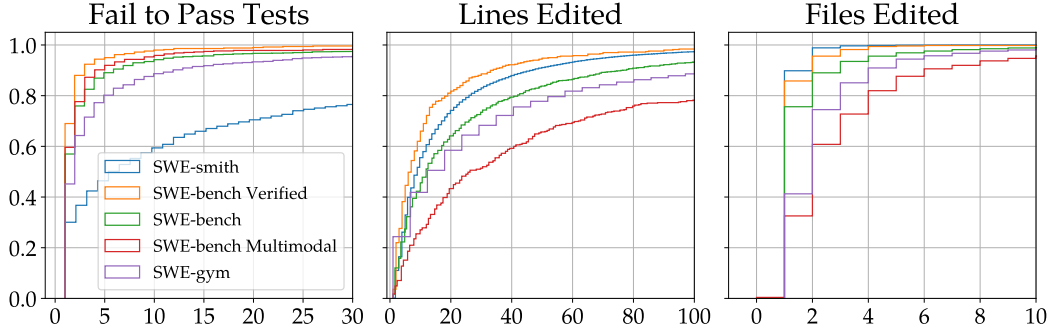

Figure 14: Comparison of cumulative distributions for Fail-to-Pass tests along with the lines and files edited by the gold patch across SWE-smith and four SWE-bench style datasets.

instructions. Across time, the continuous evolution of a repository and its dependencies make for an incredibly high degree of variability in how a repository should be installed correctly. To solve this variability, the community has resorted to creating an image per task instance, as done in Chowdhury et al. [9]. Therefore, for 2294 SWE-bench task instances, there are 2294 unique Docker images, each at a size of at least several gigabytes ( $\sim 5$ -6 GBs).

On the other hand, the simplicity and scalability of SWE-smith’s design allows one to support many task instances with comparatively much fewer Docker images. As mentioned above, installation and testing procedures are (repository, commit) specific. Therefore, when bugs are generated from each (repository, commit), all bugs can be reproduced and tested successfully from the same Docker image. In other words, if I generate 100 bugs for a repository at some commit, instead of 100 Docker images, only a single Docker image is required to run inference on any of the 100 task instances.

This design is what enables SWE-smith to be significantly more space-efficient than SWE-bench. Based on the publicly released images, for SWE-bench’s 2294 task instances, 1.2 TBs of storage are required to download all Docker images locally. for SWE-bench Multimodal’s 517 task instances, 1.2 TBs are required. The higher per-instance Docker image size for SWE-bench Multimodal is due to how JavaScript dependency management tools (e.g. npm) require more storage compared to equivalent Python infrastructure (e.g. pypi). Pan et al. [31] states that each image for the 2438 instances an average of 2.6GB, totaling 6 TB of storage total. Such a storage requirement can be a significant barrier for academic practitioners.

On the other hand, with more than 20x the number of bugs, SWE-smith requires only 125 Docker images total, corresponding to the number of unique (repository, commit) pairs (in this work, for each repository, we only determine installation and test specifications for one commit). The 125 images require a total of 290.54 GBs. In summary, compared to SWE-bench’s task collection strategy, SWE-smith’s design makes it easier to not only create task instances, but also train on them as well.

## D.2 Case Study: SWE-bench & SWE-smith

To better understand the differences between the SWE-bench and SWE-smith collection strategies, we perform SWE-smith collection on the `pallets/flask` GitHub repository, one of the 12 test split repositories from the original SWE-bench benchmark. We review the steps covered in Section 2.1 applied to `pallets/flask` in detail. First, we defined the installation and testing specifications

for the `pallets/flask` repository at commit `bc09840`. Next, we apply the LM modification bug generation strategy to this version of the repository, generating 267 unique bugs.

We observe several differences. First, *the SWE-smith collection strategy yields a much higher number of bugs outright*. From SWE-bench, 11 task instances are from the `pallets/flask` repository. The task instances were originally filtered from 2434 pull requests (PRs), with 107 satisfying SWE-bench’s filtering criteria of (1) being linked to one or more issues and (2) featuring 1+ new tests. Out of these 107, the 11 (0.45% of 2434) task instances represent the proportion of PRs that execution environments could be successfully constructed for. On the other hand, running the function-level rewriting strategy for bug generation originally yielded 402 candidates, of which 267 were determined to be valid task instances.

Second, *SWE-smith requires significantly less human effort while only incurring minor costs*. Collecting the 11 `pallets/flask` task instances (steps include scraping PRs, determining repository versions across time, defining version-specific installation/test specifications, running execution-based validation multiple times) took an estimated 38 hours worth of human labor. On the contrary, defining installation and testing specifications for the latest commit of `pallets/flasks` took 10 minutes. The subsequent function-level rewriting strategy for bugs took 23 minutes to run, incurring a total cost of just \$2.47 ( $\sim$ \$0.00613 per instance). The final execution-based validation step that filters out  $402 - 267 = 135$  unqualified bug candidates ran in 14 minutes. Since both the bug and problem statement generation strategies are repository agnostic, no additional human intervention is necessary for these steps. Head to head, per instance for the `pallets/flask` repository, SWE-bench style collection requires  $38 \times 60 / 11 = 207.27$  minutes compared to 0.176 minutes ( $\sim$  10.6 seconds) and \$0.00613 in API costs using SWE-smith.

Third, *collectively, SWE-smith task instances break a significantly larger proportion of existing tests in a codebase*. We define “bug coverage” as the proportion of tests broken by 1+ instance across all task instances. For the SWE-bench split of `pallets/flask`, there are 207 unique tests across all 11 instances. Of these 207 tests, 15 are broken by 1+ instance, corresponding to a bug coverage rate of 7.25%. For the SWE-smith split of `pallets/flask`, there are 474 unique tests across 267 instances. The larger amount of tests is due to increased test coverage in the `pallets/flask` repository as of Nov. 28, 2024 (when SWE-smith was collected) compared to June 2023 (when SWE-bench was collected). Of these 474 tests, 422 are broken by 1+ instance, a bug coverage rate of 89.03%. We attribute the significant difference to a consistent tendency in real world open source software development workflows, that is, the *minority* of tests are introduced to capture existing, errant behavior in the repository. The significant majority of tests are committed alongside working code, ensuring that already correct behavior is upheld. Well-maintained repositories will typically not merge commits that cause such tests to fail. This results in a large number of tests where few to no commits correspond to those tests’ failures.

Finally, *SWE-smith does not yield instances appropriate for evaluation*. The SWE-smith pipeline as presented does not produce hidden tests, a crucial difference that makes SWE-bench more suitable for evaluation. Consequently, when expert trajectories are generated, the Fail-to-Pass tests are present in the repository at inference time. Furthermore, our issue generation strategy does not include checks for known problems such as underspecified text descriptions or solution leakage [9]. Simple amendments could make SWE-smith task instances suitable for evaluation, such as deleting Fail-to-Pass test functions or files along with a validation procedure around the ambiguity and leakage of the issue text. Finally, thorough analyses of how faithful SWE-smith task instances are to real world issues and PRs would be necessary to justify synthetic bugs for evaluation.

## E Difficulty Rating

We train a model that labels a task with one of three difficulty labels:  $< 15$  minutes (easy), 15 minutes - 1 hour (medium), and 1+ hour (hard). This model allows us to quantify the difficulty of individual task instances and, in aggregate, the difficulty of entire datasets.

To train this model, we use 1699 annotations from Chowdhury et al. [9]. In their work towards curating SWE-bench Verified, a subset of 1699 SWE-bench task instances were labeled with four difficulty levels:  $< 15$  min, 15 min - 1 hr, 1-4 hrs, and 4+ hrs. Generally, three annotators were assigned to each instance, and the difficulty annotations were ensembled by taking the majority

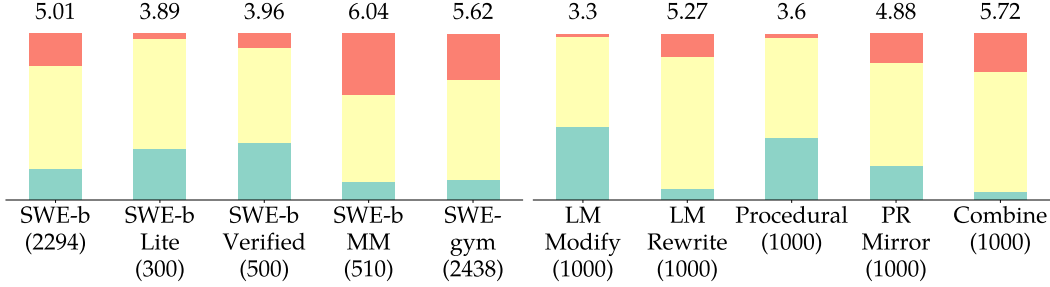

Figure 15: Distribution of task instance difficulty (easy/medium/hard) for existing SWE-bench style datasets (left 5 bars) and SWE-smith (right 5 bars), assessed by our difficulty rating model. The average difficulty score for each dataset is listed above each bar. For SWE-smith, per bug strategy, we sample 1000 task instances with LM generated issue text.

choice for a sample, or the median if there is no majority. The distribution of annotated difficulties, from easiest to hardest, is 24.5%, 53.5%, 19.4%, and 2.8%.

Because there are very few samples in the 4+ hr category, we reclassify the 1-4 hr and 4+ hr instances into a single 1+ hr category. Next, we create corresponding train and test datasets at a 80/20% split, randomly shuffling the instances while ensuring the train and test distributions do not deviate significantly from the original. An instance’s problem statement and solution patch are provided as input, and one of the three difficulty labels serves as the target output. We perform LoRA fine-tuning [13] on a Qwen 2.5 32B Instruct model using the Unsloth [10] library. The model achieves an accuracy of 75.3% on the test set. All errant predictions are off by one; in other words, the model never predicted < 15 min when the label was 1+ hr, and vice versa.

Using this model, we can grade the difficulty of a SWE-smith instance once the bug patch and corresponding issue text have been created. To provide a succinct summary of difficulty for a dataset of SWE-bench style task instances, we propose a “difficulty score” metric. Each label corresponds to a numeric difficulty score of 1, 5, and 9, from easiest to hardest. The difficulty score is therefore the average difficulty score across all task instances.

Figure 15 summarizes our findings for difficulties across different SWE-bench style datasets. We provide a more thorough rundown of task instances per difficulty level in Table 14. We find that different SWE-smith bug generation methods yield different levels of difficulty. LM Modify are consistently rated to be easy - from several manual spot checks, we notice that while the prompt for LM Modify provides several examples of types of bugs and does not name specific issues to create, the large majority of bugs created by this strategy are simple variable assignment mistakes (e.g. `a=a`; `b=b` is changed to `a=b`; `b=a`). An open-ended prompt like ours does not actually yield high diversity in terms of mistakes created. Procedural modifications are, as expected, the next easiest, as the types of bugs created by this strategy are finite. PR Mirrors and LM Rewrites yield much harder tasks,

Table 14: The score is averaged over all task instances, where easy/med/hard corresponds to 1/5/9. For SWE-smith, we sample 1000 task instances per bug strategy.

| Dataset                | # Instances | Score | easy | med  | hard |
|------------------------|-------------|-------|------|------|------|
| SWE-bench              | 2294        | 5.014 | 438  | 1408 | 446  |
| Lite                   | 300         | 3.893 | 93   | 197  | 10   |
| Verified               | 500         | 3.960 | 173  | 284  | 43   |
| SWE-bench Multimodal   | 510         | 6.036 | 55   | 265  | 186  |
| SWE-gym                | 2438        | 5.625 | 288  | 1456 | 664  |
| Lite                   | 230         | 3.890 | 67   | 156  | 4    |
| SWE-smith (LM Modify)  | 1000        | 3.304 | 441  | 542  | 17   |
| SWE-smith (LM Rewrite) | 1000        | 5.272 | 68   | 796  | 136  |
| SWE-smith (Procedural) | 1000        | 3.596 | 374  | 603  | 23   |
| SWE-smith (PR Mirror)  | 1000        | 4.876 | 206  | 619  | 175  |
| SWE-smith (Combine)    | 1000        | 5.720 | 52   | 716  | 232  |



confirmed not only by our bug rating model, but also the lower average resolve rate on these tasks by our expert model (SWE-agent + Claude 3.7 Sonnet). Finally, aggregating smaller functions together is a simple but effective strategy for creating bugs that are rated as more complex. This effect aligns with our original expectations; generally, bugs that require editing more functions and files tend to be rated as more difficult. SWE-smith can be used to create task instances with a range of difficulties.

## F Experiments

In this section, we provide additional details about the configurations and parameters used to generate trajectories with an expert model and run inference on a fine-tuned model. We then provide additional ablations and analyses about the SWE-smith dataset and the agents trained on SWE-smith.

### F.1 Training Details

**Rejection sampling fine-tuning.** Our fine-tuning setup heavily inherits from Pan et al. [31]’s work. We perform full parameter fine tuning using the `torch tune` [32] library, with learning rate  $5e-5$ , maximum 3 epochs, and max context length of 32768. Training was carried on Modal [23] on 2-8 NVIDIA H100 80G GPUs. As discussed in Section 3, the procedure for rejection sampling fine-tuning (RFT) is as follows. We first generate expert demonstrations/trajectories using SWE-agent and a “strong” model (e.g. Claude 3.7 Sonnet, GPT 4o) on SWE-smith task instances. Of these, we then only train a student model on the trajectories corresponding to resolved instances.

#### Task Instance Prompt provided to SWE-agent

```
<uploaded_files>
{{working_dir}}
</uploaded_files>
I’ve uploaded a python code repository in the directory {{working_dir}}. Consider the
following PR description:

<pr_description>
{{problem_statement}}
</pr_description>

Can you help me implement the necessary changes to the repository so that the requirements
specified in the <pr_description> are met? I’ve already taken care of all changes to any of
the test files described in the <pr_description>. This means you DON’T have to modify the
testing logic or any of the tests in any way! Your task is to make the minimal changes to
non-tests files in the {{working_dir}} directory to ensure the <pr_description> is satisfied.
Follow these steps to resolve the issue:
1. As a first step, it might be a good idea to find and read code relevant to the <pr_description>
2. Create a script to reproduce the error and execute it with ‘python <filename.py>’ using
the bash tool, to confirm the error
3. Edit the source code of the repo to resolve the issue
4. Rerun your reproduce script and confirm that the error is fixed!
5. Think about edgecases and make sure your fix handles them as well Your thinking should
be thorough and so it’s fine if it’s very long.
```

**SWE-agent configuration.** We use two different configurations, one for generating trajectories with an expert model, and a separate one for running inference on the fine-tuned Qwen, student models. The configurations are generally quite similar, with minor differences around how LMs’ responses are elicited, the parsing mechanism for an LM response, constraints around message sizes, and the system prompt.

We will first review the information common to both configurations. The prompt template informing an agent of the task’s nature and problem statement is included in Figure F.1. This prompt is very similar to the original SWE-agent prompt used in Yang et al. [49]. The prompt templates for showing environment feedback are identical as well. If there is execution output, the text is simply preceded by `OBSERVATION: [output]`. If there is no output (e.g. `rm -r` succeeds silently), then the agent is



1352 informed “Your command ran successfully and did not produce any output”. The agent computer  
1353 interface (ACI) provided is also identical; SWE-agent provides LM with access to three general tools:

- 1354 • `bash`: Execute a bash command in terminal.
- 1355 • `str_replace_editor`: A tool for viewing, creating, and editing files.
- 1356 • `submit`: A special keyword for the LM to indicate the task is completed or if it is unable to  
1357 proceed further with the task.

1358 We briefly review the distinctions. First, tool invocation works differently for expert versus student  
1359 models. For the Claude and GPT series models that are used as experts, we use function calling for  
1360 models to invoke the aforementioned tools. On the other hand, the student model is asked to generate  
1361 a response with XML tags to delineate the thought and action. Therefore, when fine-tuning on expert  
1362 trajectories, a key processing step is to convert the expert trajectories’ function calling format into the  
1363 XML style response — fine-tuning *directly* on the expert trajectories does not work.

1364 We note that we use these particular settings because as of the publication of this paper, this tool  
1365 setting reflects the absolute state-of-the-art performance achieved with an open source agent system  
1366 (SWE-agent) and any existing LM (Claude 3.7 Sonnet). It is certainly possible to explore more tool  
1367 designs and experiment with different formatting calls, as many existing prior works, notably Yang  
1368 et al. [49], have performed. However, given the focus of our work, we do not bother with repeating  
1369 such a “hyperparameter sweep” across configurations for the agent system, as this effort is expensive  
1370 and has already been performed to suggest that the configuration we are using is ideal for expert level  
1371 performance.

1372 For generating trajectories with expert models, we run with a maximum of 75 steps and a cost limit of  
1373 \$2.00. A run terminates automatically when either of these limits are reached or the context window  
1374 of the expert model is exceeded. The overwhelming majority of automatic terminations are due to the  
1375 75 maximum steps limit.

1376 For running inference with student models, we run with a maximum of 75 steps or a cost limit<sup>3</sup>  
1377 of \$2.00, where the run similarly terminates when either the steps, cost or context window limit is  
1378 reached. For the student model, per LM inference call, we truncate the message history to only keep  
1379 the 5 most recent tool outputs. While we occasionally sample trajectories with the expert model set at  
1380 various temperatures, for the student model, the temperature is fixed at 0.0.

## 1381 F.2 Evaluation Datasets

1382 **SWE-bench.** SWE-bench is a widely used benchmark that evaluates AI systems on their ability  
1383 to resolve GitHub issues [18]. Given a codebase along with a description of a bug or feature, the  
1384 AI system is asked to modify the codebase in such a way that the issue presented in the descrip-  
1385 tion is resolved. SWE-bench consists of 2294 such task instances, collected from real world pull  
1386 requests (PRs) and issues in 12 GitHub repositories that are predominantly Python. As discussed in  
1387 Section 3, the Lite and Verified subsets are curated from the main SWE-bench repository with the  
1388 goal of making evaluation either more efficient or more reliable. Since evaluation on the entirety of  
1389 SWE-bench is fairly costly and does not have as many comparable references, we do not evaluate  
1390 SWE-agent-LM-32B on the entire SWE-bench test set.

1391 **SWE-bench Multimodal.** SWE-bench Multimodal applies SWE-bench collection strategy to 12  
1392 additional predominantly JavaScript and TypeScript GitHub repositories, where task instances are  
1393 associated with issues that have visual asset(s) in them [50]. The evaluation dataset consists of 510  
1394 task instances. While the original work evaluates vision language models (VLMs) specifically, we do  
1395 not evaluate SWE-agent-LM-32B which, as it is based on Qwen 2.5 Coder Instruct, does not have  
1396 the ability to process images as inputs.

1397 **SWE-bench Multilingual.** SWE-bench Multilingual is an evaluation dataset consisting of 300 task  
1398 instances that we introduce with this work. A single author carried out SWE-bench’s collection  
1399 strategy for 42 additional GitHub repositories, covering the following 9 programming languages:  
1400 JavaScript, TypeScript, C, C++, Go, Java, PHP, Ruby, and Rust. These repositories span a wide range  
1401 of application domains, including web frameworks, data storage and processing tools, core utilities,  
1402 and widely used libraries. A brief summary of the dataset is presented in Table 15.

---

<sup>3</sup>We include the cost limit in addition the step limit to provide realistic behavior with respect to handling long context. To calculate a cost value for our model, we use the gpt-4o cost function as of April, 2025.

Table 15: Number of task instances per repository and language in the SWE-bench Multilingual evaluation set. The entire dataset includes 300 task instances covering 9 languages.

|                           |           |                           |           |                    |           |
|---------------------------|-----------|---------------------------|-----------|--------------------|-----------|
| jqlang/jq                 | 9         |                           |           |                    |           |
| redis/redis               | 12        |                           |           |                    |           |
| micropython/micropython   | 5         | apache/druid              | 5         | rubocop/rubocop    | 16        |
| valkey-io/valkey          | 4         | reactivex/rxjava          | 1         | jekyll/jekyll      | 5         |
| nlohmann/json             | 1         | apache/lucene             | 9         | faker-ruby/faker   | 2         |
| fmtlib/fmt                | 11        | projectlombok/lombok      | 17        | fastlane/fastlane  | 7         |
| <b>C/C++</b>              | <b>42</b> | google/gson               | 9         | fluent/fluentd     | 12        |
| prometheus/prometheus     | 8         | javaparser/javaparser     | 2         | jordansissel/fpm   | 2         |
| caddyserver/caddy         | 14        | <b>Java</b>               | <b>43</b> | <b>Ruby</b>        | <b>44</b> |
| gin-gonic/gin             | 8         | babel/babel               | 5         | tokio-rs/axum      | 7         |
| hashicorp/terraform       | 5         | mrdoob/three.js           | 3         | nushell/nushell    | 5         |
| gohugoio/hugo             | 7         | vuejs/core                | 5         | sharkdp/bat        | 8         |
| <b>Go</b>                 | <b>42</b> | preactjs/preact           | 17        | burntsushi/ripgrep | 2         |
| briannesbitt/carbon       | 10        | axios/axios               | 6         | uutils/coreutils   | 5         |
| laravel/framework         | 13        | immutable-js/immutable-js | 2         | tokio-rs/tokio     | 9         |
| phpoffice/phpspreadsheet  | 10        | facebook/docusaurus       | 5         | astral-sh/ruff     | 7         |
| php-cs-fixer/php-cs-fixer | 10        | <b>JS/TS</b>              | <b>43</b> | <b>Rust</b>        | <b>43</b> |
| <b>PHP</b>                | <b>43</b> |                           |           |                    |           |

Like SWE-bench Verified, we curate the dataset by excluding task instances deemed by a team of three authors to have ambiguous or underspecified issue text. Each task instance edits (meaning additions and removals) on average 48 lines of code. Similar to SWE-bench and SWE-smith, the median number of Fail-to-Pass tests is one.

We introduce SWE-bench Multilingual to:

1. Provide a benchmark to evaluate model and agent performance across a variety of programming languages and application domains. Existing agent systems often rely on Python-specific tooling, effectively overfitting to the original SWE-bench [50]. Although SWE-bench Multimodal addresses this to some degree, its focus on visual inputs is a confounding factor for text-only evaluation of software engineering capabilities.
2. Remain fully compatible with SWE-bench, so current users can adopt it without changing infrastructure.
3. Keep the dataset small enough to run quickly. While concurrent work like Zan et al. [55] provides more task instances in multiple languages, we purposely constrain the number of task instances so that the dataset is easy to run quickly.

In §F.4, we briefly discuss how performance by existing state of the art methods for SWE-bench is markedly worse on SWE-bench Multilingual, then offer some clear directions for potential next steps to build better agentic coding models that would involve extending SWE-smith.

### F.3 Trajectory Dataset Breakdown

We provide a thorough review of the dataset of SWE-agent trajectories released with this work in Table 16. The majority are generated with `claude-3-7-sonnet-20250219`. To compare with prior work, a minority were generated with `claude-3-5-sonnet-20240620` and `gpt-4o-2024-08-06`. As mentioned in Section 4, to guard against the easy data bias phenomenon, we impose a per-instance cap of 3, meaning for any task instance, we include at most 3 trajectories successfully resolving that task instance in our fine-tuning dataset. From the pool of trajectories reflected in Table 16, we curate a set of 5000 trajectories that we then use to train SWE-agent-LM-32B.

Tables 17 and 18 show what repositories and bug types are represented in the final training dataset. In total, 123 repositories are represented, with at least 10 trajectories from 91 repositories. Trajectories

Table 16: Breakdown of trajectories sampled from SWE-smith. Trajectories were generated from subsets of SWE-smith that were either for the purpose of ablations or performance. All trajectories were generated with a maximum of 75 steps and a \$2 cost limit.

| Purpose                    | Bug Gen.     | Issue Gen. | # Instances | Temp. | # Traj. |
|----------------------------|--------------|------------|-------------|-------|---------|
| claude-3-7-sonnet-20250219 |              |            |             |       |         |
| Ablation<br>(Bug Type)     | LM (Modify)  | LM         | 1000        | 0     | 605     |
|                            | LM (Rewrite) | LM         | 1000        | 0     | 507     |
|                            | Procedural   | LM         | 1000        | 0     | 745     |
|                            | PR Mirrors   | LM         | 1000        | 0     | 557     |
| Ablation<br>(Issue Type)   | PR Mirrors   | Fixed      | 600         | 0     | 259     |
|                            | PR Mirrors   | F2P Test   | 600         | 0     | 390     |
|                            | PR Mirrors   | Original   | 600         | 0     | 328     |
|                            | PR Mirrors   | LM         | 600         | 0     | 319     |
| Ablation<br>(Repositories) | Procedural   | LM         | 1000        | 0     | 721     |
|                            | Procedural   | LM         | 1000        | 0     | 709     |
|                            | Procedural   | LM         | 1000        | 0     | 723     |
|                            | Procedural   | LM         | 1000        | 0     | 707     |
| Final Dataset<br>Curation  | LM (Rewrite) | LM         | 3574        | 0     | 1003    |
|                            | PR Mirrors   | LM         | 1049        | 0     | 349     |
| claude-3-5-sonnet-20250219 |              |            |             |       |         |
| Compare with prior work    | All          | LM         | 800         | 0     | 535     |
| gpt-4o-2024-08-06          |              |            |             |       |         |
| Compare with prior work    | All          | LM         | 200         | 0     | 89      |

Table 17: Bug types represented in final training dataset.

| Bug Type         | Count |
|------------------|-------|
| Combine (File)   | 123   |
| Combine (Module) | 7     |
| LM (Modify)      | 11    |
| LM (Rewrite)     | 1532  |
| Procedural       | 1495  |
| PR Mirror        | 1848  |

Table 18: Top ten repositories by number of trajectories represented in final dataset for main result.

| Repository        | Count | Repository         | Count |
|-------------------|-------|--------------------|-------|
| getmoto/moto      | 378   | sqlfluff/sqlfluff  | 122   |
| pandas-dev/pandas | 320   | pylint-dev/astroid | 110   |
| conan-io/conan    | 243   | pydicom/pydicom    | 103   |
| pydantic/pydantic | 209   | tobymao/sqlglot    | 101   |
| iterative/dvc     | 181   | pygments/pygments  | 99    |
| dask/dask         | 139   | scanny/python-pptx | 98    |

are on average 58 turns long, meaning an LM typically takes 29 actions for a given demonstration trajectory. We visualize this distribution in Figure 16

#### F.4 Training Analyses

We provide additional experiments and discussions around training SWE-agent-LM-32B.

**Pass@k trend line.** To calculate the Pass@1 score discussed in our main result, we ran SWE-agent with SWE-agent-LM-32B six times. In Figure 17 we observe increasing performance at higher values of k, a phenomenon that reflects observations in prior works across LMs for software engineering, code generation, web navigation, and theorem proving. While we do not explore work around inference time scaling and training a separate verifier model to select the best solution candidate generated by multiple roll-outs, as done in Pan et al. [31] and Jain et al. [16], SWE-agent-LM-32B is fully compatible with the generate-then-select pipelines explored by such works. Given its strong Pass@1 performance, SWE-agent-LM-32B would likely be quite competitive for Best@k results as well. As mentioned before, all trajectories generated in the course of SWE-smith have been released publicly, which the community might find useful for training better verifiers.

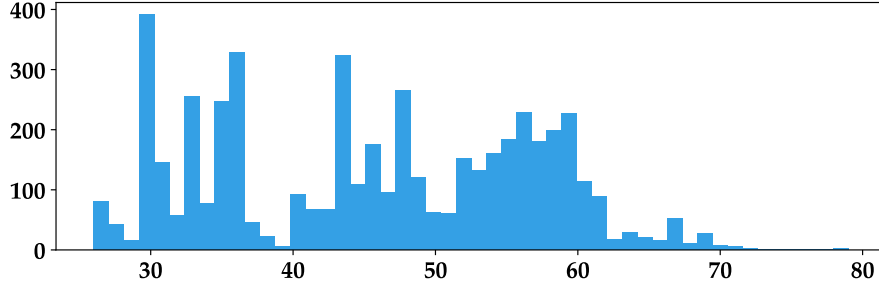

Figure 16: Distribution of number of turns for trajectories represented in the final dataset.

**Rejection sampling fine-tuning ablation.** To confirm that rejection sampling fine-tuning leads to better performance on the downstream task, we compare against a setting where we randomly sample  $n$  training points with no filtering criteria, at  $n = [100, 200, 400, 800, 1600]$  and fine-tune the same student model (Qwen 2.5 Codr Instruct 32B). We then run SWE-agent with each student model on the SWE-bench Verified dataset three times, with the “% Resolved” corresponding to the Pass@1 score. We show results in Figure 18, which confirms that fine-tuning only on trajectories corresponding to successfully resolved tasks is better than randomly sampling trajectories.

**SWE-bench Multilingual performance.** To assess how well SWE-agent-LM-32B and existing models generalize to non-Python coding domains, we evaluate the performance of our model, Qwen 2.5 Codr Instruct 32B, and Claude 3.7 Sonnet with SWE-agent on our new dataset, which we introduced in Section E.2. Out of 300 task instances, we found that Claude 3.7 Sonnet achieved a 43% Pass@1 resolve rate, which is significantly better than SWE-agent-LM-32B (8.4%) and Qwen 2.5 Codr Instruct (6.5%). SWE-agent-LM-32B does not demonstrate a significant improvement over the baseline model. Through several spot checks of different trajectories, we came to a working hypothesis that while the rejection sampling fine-tuning process had improved its ability to carry out multi-turn interactions in this task setting, there were instances where code edits reflected syntax closer to Python despite code and files viewed in previous steps clearly not being written in Python.

While the result for SWE-agent-LM-32B SWE-bench Multilingual is clearly subpar, we are excited by such a finding, as it motivates future work on top of SWE-smith. To elaborate, we expect that the path to open agent coding models capable of generalizing to many repositories and languages will be paved by more data and better training techniques, both of which SWE-smith is very capable of facilitating. First, regarding data, although we wrote SWE-smith to be Python centric, the collection methodology and bug generation techniques (especially LM based methods) should be readily transferable to other repositories. Second, the negative result on SWE-bench Multilingual provides a clear impetus for exploring whether better training techniques could lead to models that are trained on one code domain (e.g., Python), but can generalize to many languages and repositories.

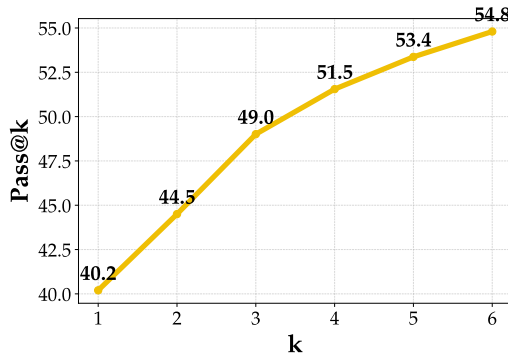

Figure 17: SWE-agent-LM-32B Pass@k curve on SWE-bench Verified. We observe higher % resolved when considering more runs.

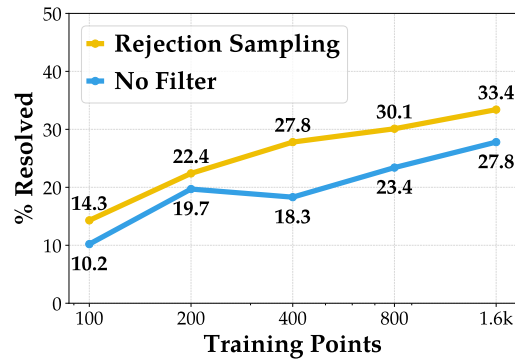

Figure 18: We confirm that rejection sampling fine-tuning leads to better performance than random sampling of trajectories for training.

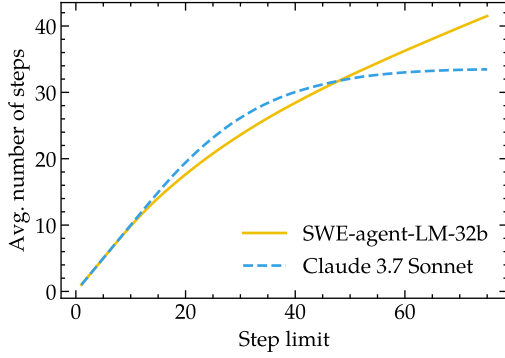

Figure 19: The average step count depends strongly on the prescribed step limit.

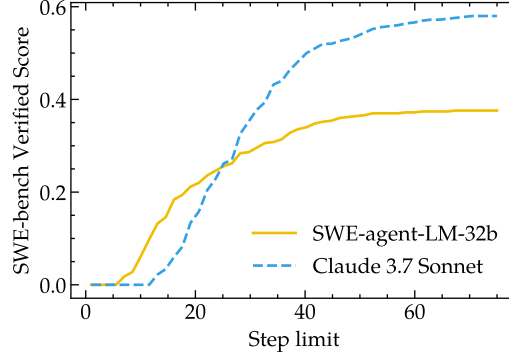

Figure 20: Number of successful instances submitted before a given step limit.

## 1471 F.5 Agent Behavioral Studies

### 1472 F.5.1 Turn counts and cost

1473 While agents are frequently quoted with a singular cost-per-instance number, this can be very  
 1474 misleading in the case of SWE-agent-LM-32B. Because most of the failed instances fail due to  
 1475 termination by the cost or turn count limit, the average cost and turn counts depend strongly on these  
 1476 limits (see Fig. 19).

1477 We can also chart the number of resolved instances vs step limits. To avoid reevaluating the agent  
 1478 with multiple step limits, we use one run with step limit 75 and then assume that a successful agent  
 1479 run that terminates after step  $n$  would have failed when restricted by a limit smaller than  $n$ . This  
 1480 chart corroborates the point made in section 3: SWE-agent-LM-32B has a higher resolution rate for  
 1481 very low step limits.

### 1482 F.5.2 Analysis of agent action space

1483 **Reduction to base commands.** In addition to the dedicated tools provided to the agent as  
 1484 part of the agent computer interface (Section F.1), the agent can execute arbitrary bash com-  
 1485 mands. This makes quantitative analyses of the agent action space challenging. For exam-  
 1486 ple, the agent might issue commands like `PYTHONPATH=/testbed/repo cd /testbed/repo && python3 reproduce.py`. We have found the following procedure to determine a *base command*  
 1487 effective to meaningfully describe the action:

- 1489 1. Strip any environment variable manipulation from the beginning of the command.
- 1490 2. When multiple commands are chained with `&&` or semicolons, only consider the last com-  
 1491 mand.
- 1492 3. Remove all arguments. Because some commands have subcommands (e.g., `git checkout`),  
 1493 we apply several basic heuristics to determine whether to keep the first or the first two words.

1494 **Repetitive actions.** We determine the longest repetitive sequence of actions by determining the  
 1495 longest sequence of identical base commands within the agent actions. Note that this means that e.g.,  
 1496 `str_replace_editor view` actions that target different files are considered to be repetitive actions  
 1497 as far as this analysis is concerned.

### 1498 F.5.3 Failure mode analysis

1499 Categorizing the failure mode proceeds as shown in Figure 21:

- 1500 1. **Error conditions:** If the agent terminates due to an error (environment errors, inability of  
 1501 the LM to correctly format its messages, etc.) or because it exceeded its maximum context  
 1502 window, we return the **error** or **context** category.
- 1503 2. **Early termination:** If the agent was terminated because of a step or cost limit, we return  
 1504 one of the **stuck ...** subcategories. Note that the SWE-agent still attempts to extract a

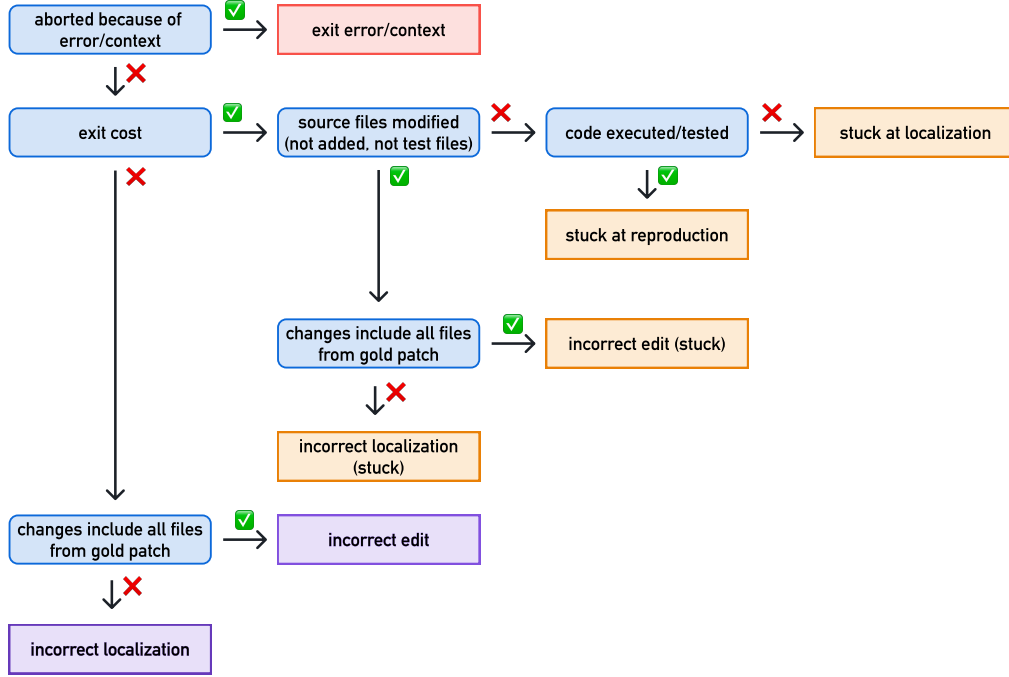

Figure 21: Categorizing failure modes

submission (list of changes/patch). We determine the subcategory based on which part of the workflow agentic loop was terminated:

- (a) If no source (i.e., non-test) file was modified<sup>4</sup> and no attempt at testing was made, we return **stuck at localization**. If test commands were run (i.e., python, pytest, ..., or similar commands), we return **stuck at reproduction**.
- (b) If source files *were* modified, we check whether the changes include changes to all source files that are modified in the gold patch. If not, we return **incorrect localization (stuck)**, else **incorrect edit (stuck)**.

3. **Successful submission:** If the agent terminated and submitted a solution naturally, we return **incorrect localization** or **incorrect edit**, depending on whether the changes from the submitted patch included changes to all files from the SWE-bench gold patch.

#### F.5.4 Mitigating repetitive actions

As described in section 4.2, SWE-agent-LM-32B frequently shows highly repetitive actions for unresolved instances. In light of this, it seems promising to investigate whether agent scaffolding interventions can be used to mitigate the problem and increase the success rates.

We make the following modification to the agent scaffold:

- We add warning messages to the observation (command output) if a base command is repeated four (`str_replace_editor view`) or six (any other base command) times. The warning message advises to try different commands, and in particular suggest to locate relevant context using `find` or `grep`.
- If the warning messages do not break the string of repetitive base commands and the repetition length reaches 6 (`str_replace_editor view`) or 8 (any other base command), every following action is resampled up to 10 times, stopping at the first base command that is distinct from the previous ones. To further increase the likelihood of breaking the cycle, we inject assistant messages or raise the temperature if the repetition length reaches 7 or 9.

<sup>4</sup>We exclude added files because solving SWE-bench instances always requires *changes* to existing files.



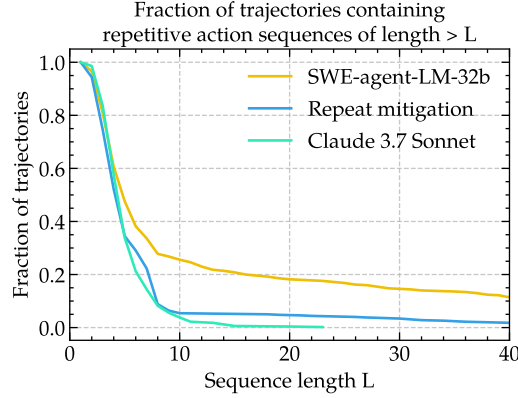

Figure 22: Scaffold interventions can drastically reduce the number of repetitive actions.

1530 This effectively reduces the number of repetitive actions (see Fig. 22). However, the overall number  
 1531 of resolved instances drops slightly to 192 (38.4%). Variations of the above strategies yield similar  
 1532 outcomes: while repetition is suppressed, success rates do not improve substantially. This may  
 1533 suggest that repetitive actions are better understood as *symptoms* of the model’s difficulty in solving  
 1534 an instance (such as when the instance is out-of-distribution or particularly challenging) rather than  
 1535 constituting intrinsic failure modes.

## 1536 G Miscellaneous

1537 **Teaser figure description.** We briefly describe how the left hand graph of Figure 1, which depicts  
 1538 scaling of task instance collection for the SWE-smith vs. SWE-bench, was created. For SWE-smith,  
 1539 we simply collected the number of task instances for each repository. For SWE-bench, we ran the  
 1540 SWE-bench task instance candidate collection script on all 128 repositories, which first crawls all  
 1541 PRs from a given repository. Then, each PR that edits at least one or more Python files and changes  
 1542 at least one or more testing related files is converted into a candidate task instance. Finally, based on  
 1543 the average task instance yield rate reported in Jimenez et al. [18], we estimate the number of viable  
 1544 task instances to be 20% of the candidates. We then determine the number of task instances for  $n$   
 1545 repositories at intervals of 5 repositories ranging from 5 to 250, where the repositories are sorted by  
 1546 number of stars. In other words, the first five repositories we account for in the figure are the five  
 1547 with the fewest number of stars out of the 128 repositories used.

1548 **Extended related works.** We discuss additional related works briefly, primarily about similar  
 1549 work towards synthesizing trajectories for training LM agents, but for the domain of web tasks.  
 1550 To improve the interactive capabilities of open source LMs [7], prior works have also explored  
 1551 trajectory generation techniques for web benchmarks and settings [45, 51, 59]. For web navigation,  
 1552 existing strategies rely on (1) performing random walks which are then labeled retroactively with  
 1553 instructions [43, 25], (2) using online web tutorials as a source of indirect supervision for generating  
 1554 synthetic trajectories [30], or (3) collecting human demonstrations [34, 47]. These procedures do not  
 1555 translate well to the software engineering setting; random sequences of command line interactions  
 1556 usually do not achieve meaningful effects on a codebase. Our cursory efforts around replaying  
 1557 trajectories synthesized from online code edit sequences (e.g. GitHub commit histories) were  
 1558 unsuccessful due to the limited information available, which primarily capture file-level changes  
 1559 without reflecting the underlying skills, decision-making, or the broader context of a software  
 1560 development process.

1561 Our exploration of using SWE-agent to automatically determine installation and testing specifications  
 1562 for a repository is heavily influenced by two research directions - automatic execution environment  
 1563 construction using LMs [6, 11, 37], and generating unit tests using LMs [26]. Although relatively  
 1564 much less than SWE-bench style collection, SWE-smith still requires minimal amounts of human  
 1565 labor (around 8 minutes total per repository). As we expand SWE-smith to more repositories and  
 1566 languages, we are continuing to consider how to completely automate the environment construction  
 1567 process end to end.



1568 **Societal Impacts.** While SWE-smith introduces powerful capabilities for generating software  
1569 engineering training data at scale, we are mindful of its potential societal impacts and have taken  
1570 steps to mitigate associated risks. For example, although automated bug generation could in principle  
1571 be misused to introduce vulnerabilities, our system is explicitly designed to operate in isolated,  
1572 sandboxed environments. We do not create or submit any artifacts to real-world repositories, ensuring  
1573 that our methods do not interfere with ongoing development or introduce instability into open-source  
1574 projects. All bug generation techniques are well documented, and we release data only after rigorous  
1575 validation, including filtering for test-breaking changes and confirming reproducibility. We also  
1576 address fairness and privacy concerns by targeting a diverse set of repositories and avoiding the  
1577 collection or use of contributor metadata. While systems trained on SWE-smith may produce incorrect  
1578 outputs even when functioning as intended, we encourage human-in-the-loop workflows and provide  
1579 infrastructure for auditability and monitoring. On the positive side, SWE-smith significantly lowers  
1580 the barrier for building open-source software engineering agents, enabling broader participation in  
1581 research and innovation. It supports advances in program repair, debugging, and education, and  
1582 facilitates the study of agent behavior in realistic settings—ultimately helping make software systems  
1583 more reliable and accessible.
